# Supplementary material for: TrpV1 receptor activation rescues neuronal function and network gamma oscillations from Aβ-induced impairment in mouse hippocampus in vitro
Source: eLife. 2018 Nov 12;7:e37703. doi: 10.7554/eLife.37703 (PMC6281315; doi:10.7554/eLife.37703)
Supplement: Figure 1—figure supplement 1—source data 1. [file elife-37703-fig1-figsupp1-data1.xlsx]

## Sheet: Gamma Power
	Gamma Power
	Control	Cp	Cp+Cz
	35.6683	7.3926	10.328
	41.1543	6.16131	0.232429
	5.14481	11.952	3.55131
	17.8198	1.44575	3.75387
	3.28548	2.74539	1.86445
	15.5921	5.65805	1.60619
	12.962	5.63704	4.93741
	6.57196		12.8682
	13.9246		3.78684
	8.34049		17.5294
	18.4379		9.34416
	27.2556		4.38316
	10.1103		7.11869
	28.1539		9.92218
			5.21984
