# Supplementary material for: TrpV1 receptor activation rescues neuronal function and network gamma oscillations from Aβ-induced impairment in mouse hippocampus in vitro
Source: eLife. 2018 Nov 12;7:e37703. doi: 10.7554/eLife.37703 (PMC6281315; doi:10.7554/eLife.37703)
Supplement: Figure 1—source data 1. [file elife-37703-fig1-data1.xlsx]

## Sheet: Gamma Power
	Gamma Power
	Control	Abeta	Abeta +WIN	Abeta +ACEA	Abeta +JWH	Abeta +WIN 1uM	Abeta +Cp	Abeta +Cp +Cz	Abeta +Cz
	15.9908	2.37375	19.5602	4.76882	12.2196	1.22828	7.34075	5.96453	0.00431424
	3.78329	0.343736	4.96401	1.60855	3.96579	10.7924	12.8729	7.7187	0.00221815
	2.57564	16.1078	2.32404	13.8234	3.39291	5.46449	4.26528	0.83852	0.000530856
	4.35545	12.8202	0.998863	8.66604	9.17483	5.37274	6.44642	1.6668	0.00235288
	7.25446	2.60274	9.54859	9.88221	3.1211	0.985973	21.3222	5.27569	0.00165791
	7.78724	5.08289	0.581101	2.14966	15.9847		13.2638	3.18218	0.00216796
	1.41106	5.14606	1.97791	1.6011	4.30281		3.64412	4.66785	0.00265031
	4.88153	0.829576	3.31929	7.18868	6.18692		15.8521		0.000939527
	10.8535	5.08001	1.83938	2.31283	1.03172		1.97743		0.00469764
	12.5551	1.53799	2.28932	6.31834	0.949547		14.8074		0.000830056
	4.38241	1.91824	2.22866	5.13592			29.3608		0.00272632
	5.75117	0.40546	2.35153	5.53749			3.48983		0.000545789
	1.62759	1.34515	1.88016	10.1078			9.93614		0.000963435
	1.59966	1.3341	1.90794	2.74725			23.0232		0.00417895
	35.6685	1.66279	3.0731	4.29648			7.29342
	41.1543	8.0244	6.90057	10.8228			8.78805
	5.14481	2.3613	3.04768	11.5685			12.3058
	17.8198	12.6495	5.85456	3.76634			16.5564
	2.82651	8.23658		3.17653
	15.2502	4.26579		2.3893
	12.223			4.23796
	6.57195
	13.9246
	8.34049
	18.4379
	27.0645
	10.0203
	28.0215
	13.8937
	8.68306
	11.6305
	9.62819

## Sheet: Coefficient of Rhythmicity
	Coefficient of Rhythmicity
	Control	Abeta	Abeta +Cp	Abeta +Cp +Cz	Abeta +Cz
	0.583492	0.486617	0.397413	0.345422	0.69025
	0.525582	0.345974	0.450535	0.465544	0.462455
	0.582845	0.532995	0.4535	0.347315	0.513413
	0.483779	0.518259	0.600224	0.508744	0.690418
	0.538053	0.624336	0.523322	0.438788	0.545069
	0.418762	0.393739	0.409634	0.413004	0.590896
	0.561218	0.563149	0.571698	0.449168	0.539154
	0.592759	0.33125	0.545939		0.367053
	0.519547	0.593293	0.578009		0.531729
	0.604826	0.396434	0.56862		0.49783
	0.644824	0.230581	0.332631		0.256053
	0.430826	0.479711	0.508518		0.504657
	0.575059	0.354801	0.541975		0.301569
	0.524764	0.500999	0.653135		0.529027
	0.354328	0.454691	0.304717
	0.540174	0.425856	0.571239
	0.385677	0.333657	0.606395
	0.401613	0.446021	0.435603
	0.477352	0.428117
	0.522284	0.475385
	0.491819
	0.512746
	0.509653
	0.487006
	0.583712
	0.555758
	0.449831
	0.320446
	0.523949
	0.546515
	0.455442
	0.365138
