# Supplementary material for: TrpV1 receptor activation rescues neuronal function and network gamma oscillations from Aβ-induced impairment in mouse hippocampus in vitro
Source: eLife. 2018 Nov 12;7:e37703. doi: 10.7554/eLife.37703 (PMC6281315; doi:10.7554/eLife.37703)
Supplement: Figure 2—source data 1. [file elife-37703-fig2-data1.xlsx]

## Sheet: Gamma Power
	Gamma Power
	Control	Abeta	Abeta +Cp
	4.0773	2.47277	0.391756
	2.73519	3.21784	0.557525
	1.82329	0.807095	0.266422
	1.79298	1.97028	0.19034
	4.58155	0.769689	0.0858941
	1.26646	0.383619	0.356436
	0.636648	0.7081	2.15468
	7.11095	1.39276	3.24468
	4.42292	3.47892
	6.15785

## Sheet: Coefficient of Rhythmicity
	Coefficient of Rhythmicity
	Control	Abeta	Abeta +Cp
	0.381253	0.36539	0.430057
	0.372069	0.517273	0.361706
	0.35155	0.315595	0.362424
	0.44732	0.606817	0.292064
	0.515074	0.495646	0.246357
	0.304032	0.407938	0.271491
	0.521603	0.580091	0.675127
	0.646979	0.594059	0.70454
	0.710859	0.682225
	0.674118
