# Supplementary material for: TrpV1 receptor activation rescues neuronal function and network gamma oscillations from Aβ-induced impairment in mouse hippocampus in vitro
Source: eLife. 2018 Nov 12;7:e37703. doi: 10.7554/eLife.37703 (PMC6281315; doi:10.7554/eLife.37703)
Supplement: Figure 3—source data 1. [file elife-37703-fig3-data1.xlsx]

## Sheet: Gamma & AP Firing
	Gamma Power			AP Firing			Membrane Potential
	Control	Abeta		Control	Abeta		Control	Abeta
	0.00162399	0.00115077		0.393333	0.213333		-35.7637	-34.5013
	0.000734301	0.000599217		0.313333	0.113333		-45.1667	-47.4926
	0.000285891	0.000191379		4.64	2.10333		-40.9157	-31.6643
	0.00132194	0.00108603		3.39333	1.60667		-36.6117	-34.7744
	0.000137959	9.31855e-05		0.993333	0.37		-42.2211	-42.5768
	0.000504698	0.000445885		1.38333	1.1		-42.408	-42.3934
	0.000744104	0.000331866		4.93667	1.12		-41.0011	-41.5981
	0.00087985	0.000306288		1.12667	1.5		-37.9992	-43.7298
	0.0013342	0.000798374		1.27667	0.466667		-39.9881	-40.4596
	0.00142263	0.000715427		1.46	0.516667		-41.8901	-42.0082
	0.000492616	5.07958e-05

## Sheet: Spike Phase Analysis
	AP Phase angle quantification			Gaussian fit half-width
	Control	Abeta		Control	Abeta
	6.41531	6.34861		5.65157	7.62726
	6.505	6.36561		2.26651	2.13983
	6.59285	6.42545		2.78104	2.69627
	6.60612	6.57805		3.23317	3.53458
	6.68316	6.57871		3.41213	4.1539
	6.76862	6.77697		1.96981	3.31088
	6.81474	6.81109		2.60443	6.05895
	6.86889	6.89369		1.50096	2.0235
	6.8824	6.90773		7.22223	8.36432
	6.89489	7.1703
	6.94013	7.23085
	6.96248	7.37221
	6.9801	7.51146
	7.04311	1.6474
	7.09857	1.70288
	7.13459	1.71386
	7.34581	1.7914
	7.40509	1.88933
	7.45561	2.09328
	7.51687	2.15136
	7.69525	2.47608
	7.83106	2.61958
	7.8886	2.62795
	7.90891	2.74227
	8.09294	2.75616
	8.1306	2.84823
	8.14137	2.98478
	8.19571	3.02276
	8.21182	3.09955
	8.23434	3.21402
	8.27006	3.44878
	2.17238	3.5712
	2.37028	3.57742
	2.42012	3.6155
	2.4668	3.62337
	2.51288	3.7576
	2.55383	3.89985
	2.60136	3.96722
	2.63796	4.01791
	2.73056	4.09116
	2.87986	4.22582
	2.90151	4.27653
	2.97126	4.38865
	2.99443	4.49578
	3.01807	4.58488
	3.03688	4.6566
	3.0569	4.68683
	3.2325	4.76696
	3.25892	5.03225
	3.33067	5.05408
	3.56389	5.20366
	3.61285	5.29153
	3.65927	5.35605
	3.69858	5.38758
	3.87168	5.41221
	3.87178	5.42442
	3.88547	5.5285
	4.03884	5.55927
	4.0446	5.6302
	4.0727	5.7041
	4.15327	6.03951
	4.15895	6.04946
	4.19969	6.19705
	4.24671	6.22483
	4.25747	6.28733
	4.27118	6.30304
	4.27404	6.30354
	4.30793	6.30595
	4.32019	6.30756
	4.32815	6.30973
	4.37675	6.31526
	4.48364	6.31529
	4.49483	6.31943
	4.51356	6.3254
	4.60651	6.32973
	4.66128	6.33425
	4.80935	6.33701
	4.87405	6.33762
	4.91303	6.34301
	4.93921	6.34605
	4.96928	6.34652
	4.97288	6.34977
	4.99158	6.35876
	5.00034	6.35944
	5.03729	6.36115
	5.11209	6.36154
	5.14646	6.36498
	5.15719	6.37106
	5.29096	6.37626
	5.35123	6.38054
	5.35909	6.38277
	5.38766	6.38913
	5.39689	6.39319
	5.41744	6.3966
	5.42847	6.40124
	5.51729	6.40173
	5.6596	6.40371
	5.6917	6.40934
	5.72248	6.41185
	5.72362	6.41744
	5.73599	6.41927
	5.74484	6.422
	5.77814	6.42218
	5.81475	6.42229
	5.9376	6.42288
	5.94063	6.42654
	5.94985	6.42773
	5.96597	6.4297
	5.98966	6.43328
	6.01003	6.43442
	6.02597	6.43585
	6.03256	6.44231
	6.06883	6.44288
	6.1698	6.44733
	6.17087	6.45256
	6.2097	6.4526
	6.26144	6.45958
	6.2858	6.46194
	6.286	6.46283
	6.28829	6.47475
	6.2895	6.4766
	6.29091	6.4783
	6.29226	6.48064
	6.29655	6.49285
	6.29661	6.49704
	6.2991	6.49807
	6.30701	6.49813
	6.30931	6.50058
	6.31098	6.51084
	6.31298	6.51149
	6.31515	6.5123
	6.31841	6.51727
	6.32249	6.5189
	6.32277	6.5372
	6.3236	6.54163
	6.32432	6.54646
	6.32462	6.54674
	6.32579	6.55778
	6.3263	6.55865
	6.32725	6.55975
	6.32986	6.56023
	6.33101	6.56452
	6.33323	6.57874
	6.33327	6.58346
	6.33333	6.58485
	6.33395	6.58715
	6.33509	6.58749
	6.33544	6.58943
	6.33876	6.59281
	6.34337	6.59564
	6.34386	6.60139
	6.34807	6.60443
	6.34826	6.60511
	6.34976	6.61393
	6.35274	6.61443
	6.35392	6.61453
	6.35451	6.61677
	6.3553	6.61739
	6.3555	6.6188
	6.36062	6.6451
	6.36225	6.64839
	6.36374	6.64922
	6.36393	6.65036
	6.36515	6.65906
	6.36761	6.66191
	6.36792	6.66568
	6.37148	6.68076
	6.37684	6.68394
	6.3781	6.68511
	6.37961	6.68801
	6.37975	6.68849
	6.38003	6.69302
	6.3811	6.69404
	6.38685	6.69624
	6.38689	6.70517
	6.38919	6.70736
	6.39127	6.70945
	6.39161	6.70973
	6.39359	6.71021
	6.39567	6.71115
	6.39571	6.7219
	6.39588	6.72399
	6.39588	6.72686
	6.396	6.72828
	6.39722	6.73203
	6.39845	6.7337
	6.39943	6.73578
	6.39951	6.73919
	6.39955	6.7395
	6.40249	6.74152
	6.40525	6.74308
	6.4113	6.76109
	6.41253	6.7662
	6.41343	6.76893
	6.41617	6.78201
	6.41913	6.78417
	6.42108	6.7842
	6.42202	6.78905
	6.42546	6.78985
	6.426	6.79099
	6.43518	6.79236
	6.43554	6.79272
	6.43571	6.7959
	6.43786	6.79631
	6.43977	6.80291
	6.44024	6.80793
	6.44695	6.81174
	6.4474	6.81479
	6.45127	6.82283
	6.45238	6.82625
	6.45289	6.82697
	6.45428	6.83578
	6.45537	6.83802
	6.46078	6.83802
	6.46126	6.84116
	6.46183	6.84832
	6.4671	6.85476
	6.46966	6.85526
	6.47059	6.8573
	6.47139	6.85736
	6.47142	6.86595
	6.47158	6.86727
	6.47273	6.86734
	6.47432	6.86812
	6.47605	6.87135
	6.47867	6.8742
	6.48631	6.87515
	6.48859	6.87974
	6.48978	6.88192
	6.49151	6.89289
	6.49435	6.89579
	6.4982	6.89721
	6.49825	6.89937
	6.50063	6.90209
	6.50247	6.90237
	6.50661	6.90895
	6.51318	6.91059
	6.51437	6.91472
	6.51461	6.92066
	6.51516	6.92277
	6.51558	6.92903
	6.52107	6.92956
	6.52503	6.9485
	6.52532	6.95051
	6.52627	6.95186
	6.52806	6.95308
	6.52828	6.95588
	6.52851	6.95616
	6.52852	6.97007
	6.5286	6.97823
	6.52909	6.97825
	6.53063	6.98079
	6.53173	6.98689
	6.53306	6.98724
	6.5359	6.99475
	6.53729	6.99521
	6.5387	6.99599
	6.53881	6.9963
	6.54041	7.00257
	6.54137	7.00431
	6.54251	7.00823
	6.54449	7.00896
	6.54734	7.0097
	6.54867	7.0104
	6.55116	7.01862
	6.55603	7.02406
	6.55784	7.02593
	6.55858	7.0274
	6.5594	7.02826
	6.56058	7.02841
	6.56361	7.03078
	6.56519	7.03631
	6.56739	7.04965
	6.5677	7.06069
	6.56879	7.06535
	6.56929	7.06963
	6.57052	7.07206
	6.57155	7.07995
	6.57243	7.08338
	6.57567	7.09449
	6.57575	7.09612
	6.57783	7.10468
	6.57827	7.12192
	6.57892	7.13031
	6.58162	7.13763
	6.58274	7.14012
	6.58298	7.152
	6.58655	7.15486
	6.58717	7.15731
	6.58968	7.15875
	6.5955	7.16432
	6.59732	7.16571
	6.59926	7.16702
	6.60081	7.16712
	6.60248	7.16879
	6.60321	7.17916
	6.6052	7.18141
	6.60618	7.18364
	6.60672	7.18584
	6.60721	7.18992
	6.60775	7.19284
	6.61358	7.20422
	6.61613	7.21012
	6.61622	7.24165
	6.6185	7.25802
	6.62122	7.2596
	6.62366	7.26826
	6.62464	7.26868
	6.62836	7.27077
	6.62881	7.27261
	6.63164	7.29433
	6.63201	7.29439
	6.63358	7.30733
	6.63397	7.30767
	6.63813	7.31328
	6.64067	7.32257
	6.64188	7.32758
	6.64382	7.32854
	6.64417	7.32881
	6.64475	7.33038
	6.6483	7.33323
	6.64984	7.33552
	6.65017	7.35195
	6.65202	7.35248
	6.65318	7.36086
	6.655	7.36602
	6.66003	7.3762
	6.66119	7.38055
	6.66187	7.39028
	6.66597	7.39186
	6.67004	7.39542
	6.67112	7.39759
	6.67207	7.40378
	6.67248	7.4056
	6.67364	7.40912
	6.68292	7.42523
	6.68598	7.4404
	6.68649	7.4539
	6.68726	7.45572
	6.68765	7.45602
	6.6887	7.46404
	6.69038	7.47355
	6.69048	7.48037
	6.69222	7.48212
	6.69387	7.48626
	6.69397	7.48719
	6.6973	7.49648
	6.70551	7.49929
	6.70685	7.50283
	6.70773	7.50441
	6.71196	7.50647
	6.71452	7.51757
	6.71815	7.52403
	6.71867	7.54835
	6.71996	7.55104
	6.72023	7.55128
	6.72103	7.57315
	6.72208	7.57332
	6.72601	7.57952
	6.72766	7.59228
	6.73014	7.59967
	6.73224	7.60804
	6.73269	7.61828
	6.73356	7.62408
	6.73438	7.6315
	6.73536	7.64882
	6.73855	7.65665
	6.74311	7.70791
	6.74577	7.71063
	6.74782	7.72747
	6.74993	7.73802
	6.75009	7.747
	6.75039	7.7746
	6.75324	7.77738
	6.75356	7.78807
	6.7549	7.79865
	6.75911	7.81313
	6.75962	7.82474
	6.76596	7.85497
	6.76639	7.86368
	6.76999	7.87158
	6.7733	7.87204
	6.77361	7.8917
	6.77606	7.89781
	6.77645	7.92645
	6.77662	7.93589
	6.77911	7.93834
	6.78134	7.96381
	6.78203	7.96696
	6.78323	7.98128
	6.78444	7.98227
	6.78552	7.99437
	6.78634	8.00397
	6.7896	8.0063
	6.7932	8.0139
	6.79671	8.03212
	6.80012	8.03847
	6.80436	8.05608
	6.80595	8.06097
	6.80613	8.08223
	6.80675	8.18263
	6.80807	8.19361
	6.8144	8.21508
	6.81845	8.22222
	6.82219	8.24281
	6.82941	8.25931
	6.83128	8.27258
	6.83266	8.29633
	6.83426	8.30088
	6.83449	8.3069
	6.83584	8.32272
	6.83885	8.35062
	6.83998	8.40045
	6.84	8.41708
	6.84046	8.42639
	6.84048	8.4313
	6.84058	8.47882
	6.84437	8.48276
	6.84646	8.52962
	6.84729	8.53182
	6.84785	8.53245
	6.85256	8.56132
	6.85288	8.5796
	6.8561	8.58635
	6.85725	8.59165
	6.86119	8.593
	6.86896	8.59587
	6.87207	8.61338
	6.87599	8.63821
	6.87676	8.64134
	6.87887	8.67353
	6.87889	8.68077
	6.87946	8.69498
	6.88254	8.71471
	6.88439	8.72252
	6.88486	8.74329
	6.89338	8.7469
	6.89436	8.8466
	6.89676	8.98912
	6.89947	8.99622
	6.9002	9.0514
	6.90654	9.07101
	6.90697	9.08458
	6.90698	9.25562
	6.90731	9.30029
	6.91009	9.36291
	6.9129	9.437
	6.91461	9.44173
	6.91552	9.58013
	6.91671	9.69425
	6.9189	9.75501
	6.92187	3.58094
	6.92252	3.71484
	6.92433	3.85515
	6.92586	3.93092
	6.92664	3.95303
	6.92905	4.08251
	6.93425	4.09147
	6.93625	4.14839
	6.93837	4.15205
	6.93934	4.17612
	6.94013	4.17814
	6.94256	4.26622
	6.95134	4.29008
	6.95314	4.29398
	6.95352	4.33017
	6.95627	4.33219
	6.95898	4.35623
	6.96857	4.37223
	6.97111	4.44671
	6.97119	4.51395
	6.97642	4.60461
	6.97769	4.69043
	6.97956	4.70712
	6.98186	4.74094
	6.9835	4.79206
	6.9866	4.80118
	6.9882	4.81555
	6.99013	4.82068
	7.00037	4.82245
	7.00317	4.83342
	7.01324	4.84428
	7.01536	4.85585
	7.01684	4.8675
	7.01897	4.8753
	7.01914	4.88755
	7.02265	4.91122
	7.02509	4.94252
	7.02554	4.96588
	7.02683	4.98546
	7.02698	5.00976
	7.03296	5.01634
	7.03575	5.02364
	7.03766	5.02975
	7.03823	5.04942
	7.04337	5.04944
	7.04337	5.05015
	7.04598	5.05734
	7.04942	5.05891
	7.0555	5.10393
	7.06068	5.12026
	7.07105	5.12327
	7.07201	5.13015
	7.07517	5.14235
	7.08053	5.17105
	7.08217	5.18839
	7.08517	5.18933
	7.08698	5.24393
	7.08701	5.25694
	7.08807	5.25847
	7.08955	5.26168
	7.10114	5.26725
	7.10158	5.27365
	7.10402	5.27816
	7.10665	5.2954
	7.10807	5.30486
	7.10846	5.31655
	7.1258	5.42795
	7.1258	5.43033
	7.12628	5.43237
	7.12796	5.43491
	7.12868	5.43533
	7.12893	5.44596
	7.13117	5.45765
	7.13141	5.46357
	7.13469	5.46525
	7.13793	5.47064
	7.13799	5.48013
	7.13805	5.48483
	7.14482	5.48908
	7.14551	5.50354
	7.14709	5.50994
	7.14734	5.51834
	7.15006	5.52535
	7.15298	5.52727
	7.15447	5.5313
	7.15502	5.53547
	7.16107	5.54136
	7.1688	5.55868
	7.16899	5.56166
	7.17463	5.5636
	7.17962	5.60191
	7.18343	5.60573
	7.18508	5.60779
	7.18555	5.61275
	7.19019	5.61857
	7.1943	5.63029
	7.19799	5.63109
	7.19984	5.63591
	7.20824	5.63859
	7.21109	5.64391
	7.22597	5.64558
	7.23147	5.64632
	7.23499	5.67657
	7.23746	5.6766
	7.23885	5.68422
	7.23887	5.69192
	7.2389	5.69404
	7.24404	5.69533
	7.2455	5.71996
	7.25135	5.72268
	7.25695	5.72398
	7.25703	5.72527
	7.25807	5.73543
	7.25901	5.74291
	7.25964	5.74493
	7.26501	5.74574
	7.26591	5.74746
	7.27294	5.7488
	7.27609	5.75363
	7.29279	5.7549
	7.29482	5.75595
	7.30847	5.75628
	7.31182	5.75802
	7.31241	5.7592
	7.32158	5.76458
	7.32322	5.76732
	7.32439	5.77252
	7.3391	5.77471
	7.35594	5.77801
	7.35651	5.78239
	7.36008	5.799
	7.36834	5.79997
	7.37775	5.80066
	7.38152	5.80133
	7.38169	5.8056
	7.39208	5.80828
	7.40039	5.82459
	7.40343	5.82776
	7.40925	5.82797
	7.4107	5.84834
	7.415	5.85243
	7.42492	5.85984
	7.42618	5.86105
	7.42978	5.86212
	7.4298	5.8813
	7.43808	5.88237
	7.441	5.88425
	7.44592	5.88743
	7.4523	5.90668
	7.45457	5.90891
	7.45906	5.91304
	7.46036	5.9165
	7.46255	5.91849
	7.47345	5.92187
	7.48595	5.92378
	7.49009	5.93157
	7.49475	5.93757
	7.49721	5.93764
	7.49757	5.93859
	7.5033	5.94566
	7.50912	5.95989
	7.51062	5.96743
	7.51805	5.97173
	7.54056	5.97687
	7.56484	5.97891
	7.58701	5.98125
	7.58768	5.98206
	7.59768	5.98897
	7.59927	5.99205
	7.59986	5.99282
	7.60447	5.99958
	7.62218	6.00428
	7.62223	6.01351
	7.62583	6.02181
	7.62906	6.0243
	7.63079	6.02805
	7.64266	6.0352
	7.65107	6.03531
	7.65252	6.04032
	7.66309	6.04087
	7.70044	6.04147
	7.70048	6.04177
	7.71377	6.04237
	7.71701	6.0571
	7.71828	6.0631
	7.73287	6.06951
	7.73474	6.07516
	7.73607	6.07621
	7.73684	6.08091
	7.73741	6.08405
	7.73753	6.08678
	7.73889	6.08883
	7.74197	6.09495
	7.75217	6.10293
	7.75517	6.10796
	7.75529	6.11739
	7.75857	6.12872
	7.75976	6.13356
	7.79017	6.13478
	7.81022	6.13514
	7.81262	6.13894
	7.82005	6.14277
	7.82552	6.15137
	7.82676	6.15176
	7.8305	6.15724
	7.83853	6.16273
	7.84674	6.16471
	7.85543	6.18201
	7.88037	6.18623
	7.89373	6.18909
	7.91264	6.19531
	7.91624	6.19604
	7.92278	6.20111
	7.92832	6.20851
	7.9465	6.21058
	7.97974	6.21655
	7.98629	6.21674
	8.00374	6.2199
	8.04034	6.23665
	8.0477	6.24469
	8.05189	6.2591
	8.06579	6.26121
	8.06863	6.27017
	8.07145	6.27027
	8.10493	6.27688
	8.11932	6.27937
	8.13119	6.28742
	8.1839	6.29097
	8.19938	6.30476
	8.2385	6.30524
	8.25118	6.30542
	8.2635	6.32913
	8.28589	6.33852
	8.28835	6.34418
	8.32024	6.34824
	8.4689	6.37392
	8.4925	6.37399
	8.5038	6.37992
	8.57734	6.38236
	8.61388	6.39323
	8.61828	6.39912
	8.63948	6.40031
	8.65519	6.40655
	8.65674	6.40728
	8.66446	6.41359
	8.68487	6.41381
	8.71118	6.41572
	8.78069	6.43224
	8.81051	6.44052
	8.85014	6.44425
	8.86549	6.45469
	8.92376	6.46512
	8.92661	6.46728
	8.93298	6.48716
	8.93637	6.48762
	8.94004	6.48927
	8.98116	6.5014
	9.00944	6.50284
	9.02648	6.51593
	9.0356	6.51802
	9.10808	6.52309
	9.20451	6.52863
	9.21913	6.54361
	9.22341	6.54434
	9.25508	6.55048
	9.26502	6.56967
	3.00832	6.57502
	3.08726	6.57554
	3.12701	6.57703
	3.17655	6.5788
	3.18172	6.59341
	3.18892	6.60513
	3.19025	6.60939
	3.26841	6.61187
	3.3131	6.61198
	3.32122	6.61737
	3.33085	6.62504
	3.33093	6.62628
	3.36409	6.63011
	3.36734	6.63256
	3.36896	6.6413
	3.38552	6.64834
	3.38735	6.65202
	3.39379	6.66541
	3.42307	6.66828
	3.47537	6.6699
	3.47836	6.67047
	3.48229	6.67987
	3.49162	6.70376
	3.50052	6.71215
	3.50431	6.71514
	3.5245	6.73036
	3.54177	6.74493
	3.56494	6.75543
	3.62412	6.76188
	3.62933	6.7961
	3.63663	6.80527
	3.63886	6.80634
	3.64153	6.81717
	3.65467	6.82558
	3.68085	6.82622
	3.71592	6.83675
	3.71923	6.84069
	3.74346	6.84625
	3.74823	6.85284
	3.75855	6.85645
	3.75883	6.86158
	3.78754	6.87029
	3.79067	6.8779
	3.8248	6.8836
	3.88135	6.89521
	3.88986	6.89759
	3.89828	6.90202
	3.89967	6.91079
	3.90287	6.91454
	3.92186	6.91608
	3.9419	6.92503
	3.9516	6.92831
	3.9633	6.94661
	3.9683	6.9565
	3.97159	6.9596
	3.97955	6.96585
	3.98031	7.0081
	3.98041	7.01048
	4.01862	7.02937
	4.03493	7.07049
	4.08282	7.07646
	4.09025	7.07899
	4.10751	7.08407
	4.12294	7.15333
	4.12562	7.16748
	4.13472	7.17494
	4.14759	7.18802
	4.15686	7.19229
	4.16608	7.19673
	4.17105	7.20658
	4.18072	7.23125
	4.19066	7.25825
	4.19926	7.308
	4.20256	7.31146
	4.23707	7.3174
	4.24141	7.32159
	4.2599	7.32577
	4.26438	7.35716
	4.26597	7.36372
	4.27147	7.3839
	4.29742	7.39009
	4.30013	7.39773
	4.30169	7.40798
	4.32095	7.40989
	4.32719	7.42634
	4.33415	7.46211
	4.3439	7.46769
	4.35446	7.47573
	4.38748	7.48534
	4.39123	7.50008
	4.40976	7.51844
	4.40995	7.5198
	4.41009	7.5438
	4.41825	7.5503
	4.43265	7.55405
	4.43297	7.56356
	4.43371	7.61047
	4.44359	7.6261
	4.45573	7.66043
	4.46645	7.66062
	4.4717	7.66383
	4.47595	7.67239
	4.48141	7.69998
	4.49258	7.72319
	4.49261	7.76521
	4.4928	7.80242
	4.49281	7.81865
	4.50137	7.95406
	4.50365	8.00363
	4.52148	8.02171
	4.52398	8.05114
	4.55188	8.07308
	4.55662	8.08784
	4.56589	8.10189
	4.58056	8.13283
	4.587	8.14097
	4.59933	8.19545
	4.59987	8.23062
	4.60892	8.24341
	4.61277	8.28427
	4.61284	8.28938
	4.6138	8.29024
	4.61535	8.37878
	4.61745	8.3818
	4.61875	8.45056
	4.6248	8.46145
	4.62561	8.47385
	4.63201	8.49033
	4.63226	8.50767
	4.63379	8.51413
	4.63559	8.54101
	4.63781	8.56949
	4.64331	8.57834
	4.67822	8.6065
	4.67827	8.60923
	4.68085	8.63421
	4.68663	8.80602
	4.68827	8.85304
	4.68879	8.89134
	4.69895	8.91101
	4.69949	8.92145
	4.70739	8.94373
	4.73218	9.01545
	4.74232	9.04021
	4.7579	9.05908
	4.76208	9.06414
	4.76502	9.09173
	4.77133	9.10131
	4.77185	9.18982
	4.77353	2.98831
	4.78585	3.05294
	4.78972	3.08578
	4.79192	3.10093
	4.79281	3.10102
	4.79526	3.19141
	4.79758	3.2188
	4.79758	3.23711
	4.80636	3.23978
	4.80751	3.24636
	4.81061	3.40677
	4.81398	3.40725
	4.81438	3.56271
	4.81473	3.62798
	4.81865	3.69174
	4.83534	3.6931
	4.84239	3.7
	4.85083	3.72896
	4.87354	3.74026
	4.87739	3.74327
	4.8803	3.77808
	4.88687	3.80126
	4.88773	3.80766
	4.88899	3.83367
	4.88978	3.847
	4.8988	3.87445
	4.90278	3.93643
	4.90629	3.95443
	4.90711	3.96752
	4.92744	4.03853
	4.92887	4.06499
	4.93004	4.1205
	4.93279	4.13183
	4.93804	4.13575
	4.93992	4.15442
	4.94262	4.17598
	4.9483	4.20317
	4.95087	4.22506
	4.95243	4.23978
	4.95329	4.25171
	4.95496	4.26616
	4.96049	4.26982
	4.96407	4.27741
	4.97063	4.27847
	4.98001	4.28583
	4.98337	4.30343
	4.98505	4.33879
	4.99092	4.34074
	4.99179	4.36642
	4.99808	4.36831
	4.99981	4.36941
	5.00243	4.37587
	5.00281	4.414
	5.01278	4.41401
	5.01683	4.41807
	5.02534	4.44121
	5.02726	4.44607
	5.03859	4.45105
	5.04176	4.45629
	5.04277	4.47558
	5.0478	4.47972
	5.04854	4.48544
	5.0488	4.49268
	5.05197	4.50434
	5.05471	4.54519
	5.06033	4.54677
	5.06279	4.55474
	5.06617	4.5598
	5.07047	4.57814
	5.07939	4.58488
	5.08342	4.59496
	5.08598	4.60053
	5.09323	4.60441
	5.09467	4.61917
	5.09474	4.63787
	5.09525	4.66406
	5.09741	4.68384
	5.09905	4.68392
	5.10167	4.69745
	5.10336	4.7183
	5.11226	4.74441
	5.11355	4.74871
	5.1139	4.77671
	5.11729	4.81624
	5.12565	4.83292
	5.12684	4.8347
	5.1269	4.86089
	5.12786	4.86887
	5.13092	4.8798
	5.13146	4.88571
	5.13973	4.90345
	5.14196	4.91597
	5.14461	4.92244
	5.14475	4.92279
	5.14764	4.93751
	5.1528	4.94748
	5.15495	4.95113
	5.15782	4.95355
	5.15868	4.9575
	5.16006	4.98342
	5.16143	4.9891
	5.16697	5.00371
	5.17001	5.01451
	5.17027	5.02586
	5.17118	5.03307
	5.17123	5.03348
	5.17245	5.03702
	5.17912	5.04134
	5.17966	5.05066
	5.18018	5.05914
	5.18171	5.10151
	5.18382	5.1108
	5.1841	5.11358
	5.18818	5.12132
	5.19146	5.12638
	5.19184	5.13204
	5.19203	5.15571
	5.1951	5.19067
	5.19552	5.19274
	5.19998	5.19673
	5.20011	5.2117
	5.20108	5.21827
	5.20237	5.22228
	5.20301	5.26481
	5.20305	5.27668
	5.20434	5.28252
	5.21837	5.28857
	5.22549	5.29349
	5.2258	5.29792
	5.23286	5.30348
	5.23305	5.30453
	5.23431	5.30552
	5.25183	5.31234
	5.25973	5.32003
	5.26202	5.32578
	5.26875	5.32618
	5.26904	5.331
	5.27086	5.33194
	5.27177	5.33554
	5.27231	5.3616
	5.27859	5.37797
	5.27944	5.37913
	5.28822	5.41823
	5.28994	5.41913
	5.2928	5.44091
	5.29321	5.45221
	5.29335	5.46138
	5.29366	5.46265
	5.29441	5.46888
	5.29995	5.48558
	5.30141	5.49278
	5.30329	5.49719
	5.30819	5.50563
	5.30944	5.50575
	5.31092	5.51471
	5.31177	5.5149
	5.31237	5.5194
	5.31454	5.54729
	5.31709	5.55257
	5.31787	5.55285
	5.33264	5.55762
	5.33533	5.5578
	5.3359	5.5579
	5.34082	5.56188
	5.3409	5.57735
	5.3428	5.58207
	5.34403	5.58553
	5.34614	5.58803
	5.35056	5.58971
	5.35422	5.60509
	5.36124	5.61298
	5.36548	5.62259
	5.3657	5.6227
	5.36629	5.62618
	5.36739	5.62674
	5.36848	5.6376
	5.37065	5.63786
	5.37411	5.6448
	5.37432	5.64546
	5.37857	5.6668
	5.37917	5.67483
	5.38158	5.68361
	5.38293	5.70409
	5.38801	5.70672
	5.38965	5.70762
	5.39188	5.72034
	5.3951	5.72605
	5.39737	5.73427
	5.3986	5.73666
	5.40097	5.73828
	5.40108	5.74977
	5.40379	5.75211
	5.404	5.75292
	5.40822	5.75365
	5.41136	5.75499
	5.41319	5.75526
	5.41526	5.75544
	5.4183	5.75765
	5.41851	5.75956
	5.41898	5.76116
	5.41899	5.7798
	5.42031	5.78009
	5.42038	5.78271
	5.4209	5.79011
	5.42269	5.79878
	5.42822	5.80908
	5.43375	5.80964
	5.43507	5.8112
	5.43708	5.82839
	5.43794	5.83056
	5.43809	5.83224
	5.43835	5.83473
	5.43949	5.83552
	5.44141	5.83905
	5.44149	5.84467
	5.44348	5.84971
	5.44438	5.86237
	5.44486	5.87387
	5.44521	5.8826
	5.44809	5.8831
	5.45372	5.88997
	5.45646	5.89116
	5.45927	5.89496
	5.46272	5.90027
	5.47009	5.90822
	5.47099	5.90952
	5.47277	5.93232
	5.47449	5.93794
	5.48214	5.94311
	5.48462	5.96668
	5.4862	5.96707
	5.49217	5.97117
	5.49252	5.97273
	5.49633	5.97379
	5.49697	5.97866
	5.497	5.99075
	5.49854	5.99722
	5.50063	5.99742
	5.5013	5.99802
	5.50268	6.00316
	5.50697	6.00605
	5.5091	6.00719
	5.51028	6.00886
	5.51375	6.0185
	5.51525	6.02021
	5.51572	6.04658
	5.51715	6.05554
	5.5175	6.0612
	5.51989	6.06781
	5.52254	6.07473
	5.52423	6.07487
	5.5253	6.07538
	5.52627	6.08075
	5.52902	6.08133
	5.52926	6.08246
	5.53123	6.08476
	5.53234	6.08523
	5.53268	6.08814
	5.53454	6.09294
	5.53519	6.09647
	5.53617	6.0996
	5.53847	6.10502
	5.53964	6.10556
	5.54171	6.11838
	5.54329	6.12167
	5.54353	6.12369
	5.54389	6.14367
	5.54833	6.14536
	5.54993	6.15007
	5.55109	6.15796
	5.55136	6.16405
	5.55348	6.168
	5.55779	6.16932
	5.55886	6.16987
	5.56852	6.17494
	5.57127	6.17798
	5.57276	6.17856
	5.57346	6.18431
	5.57507	6.1884
	5.5758	6.18977
	5.57581	6.19652
	5.57702	6.21066
	5.57726	6.22036
	5.5773	6.22257
	5.57895	6.22329
	5.58621	6.22352
	5.58637	6.2395
	5.5946	6.24302
	5.59538	6.2444
	5.59757	6.2458
	5.59821	6.24992
	5.60358	6.26057
	5.60545	6.266
	5.60636	6.2743
	5.6113	6.27834
	5.61211	6.30331
	5.61553	6.39072
	5.6176	6.62257
	5.61964	6.78932
	5.62279	7.45584
	5.62427	7.66584
	5.62436	7.66944
	5.62499	7.73931
	5.62625	7.83032
	5.63316	1.88017
	5.63329	1.95491
	5.63616	2.46584
	5.64345	2.46938
	5.6443	2.47679
	5.64663	2.53305
	5.64733	2.62873
	5.64905	2.79229
	5.66122	2.82089
	5.66171	2.8692
	5.66596	2.89925
	5.66764	2.96032
	5.67037	3.01995
	5.67087	3.03114
	5.67246	3.10905
	5.67654	3.14758
	5.67931	3.1914
	5.67992	3.23217
	5.68445	3.25429
	5.6859	3.29885
	5.69038	3.3153
	5.69253	3.36116
	5.69656	3.36587
	5.6976	3.36813
	5.69761	3.39318
	5.70366	3.47598
	5.7037	3.48706
	5.70416	3.68743
	5.70416	3.7442
	5.70609	3.7717
	5.71005	3.772
	5.71544	3.81358
	5.71553	3.81479
	5.71578	3.83295
	5.71641	3.84025
	5.71793	3.85865
	5.71961	3.89141
	5.72718	3.915
	5.72822	3.93065
	5.72835	3.97031
	5.73114	4.01687
	5.73414	4.06517
	5.73657	4.14474
	5.73866	4.26228
	5.74192	4.29929
	5.74359	4.3202
	5.74473	4.36143
	5.746	4.36613
	5.74739	4.40953
	5.74791	4.47089
	5.74962	4.48616
	5.75193	4.57967
	5.75222	4.60288
	5.75348	4.61199
	5.76757	4.61286
	5.77104	4.62682
	5.7755	4.62693
	5.77778	4.70094
	5.77791	4.79459
	5.78149	4.83542
	5.78219	4.8604
	5.78314	4.8731
	5.78473	4.94107
	5.78569	4.97332
	5.78742	5.00156
	5.79066	5.0332
	5.79551	5.08518
	5.79666	5.11596
	5.79889	5.11629
	5.8015	5.12076
	5.8018	5.13722
	5.80391	5.16618
	5.80402	5.1696
	5.80462	5.17959
	5.80705	5.21073
	5.80813	5.2234
	5.80868	5.23128
	5.80879	5.2798
	5.80935	5.30379
	5.81127	5.32708
	5.81161	5.33072
	5.81268	5.33133
	5.81471	5.36674
	5.81586	5.39497
	5.81621	5.50886
	5.81949	5.6742
	5.82054	5.67677
	5.82087	5.68438
	5.82109	5.73867
	5.82871	5.74356
	5.82898	5.74715
	5.83507	5.75468
	5.83578	5.79064
	5.83703	5.93359
	5.83707	5.95696
	5.84277	5.98268
	5.84407	5.98574
	5.84484	6.00331
	5.84512	6.04015
	5.84679	6.13782
	5.84787	6.18245
	5.85272	6.23095
	5.85298	6.38265
	5.85476	6.44436
	5.85499	6.46636
	5.85584	6.51611
	5.85611	6.53672
	5.85758	6.54857
	5.85842	6.56234
	5.86106	6.596
	5.86473	6.61439
	5.86483	6.62894
	5.8655	6.66609
	5.87096	6.68246
	5.87334	6.71377
	5.87552	6.76659
	5.87564	6.78125
	5.87857	6.79468
	5.88172	6.80158
	5.88205	6.82809
	5.88274	6.86288
	5.88796	6.88523
	5.88797	6.88568
	5.89084	6.9124
	5.89175	6.99703
	5.89191	7.16573
	5.89528	7.19565
	5.8953	7.19747
	5.89577	0.965383
	5.89598	0.989966
	5.90083	0.99578
	5.90489	1.02825
	5.9054	1.03236
	5.90981	1.22955
	5.9108	1.31899
	5.91148	1.32368
	5.91416	1.37376
	5.91464	1.37845
	5.91475	1.39288
	5.91799	1.3944
	5.91955	1.45905
	5.91989	1.47054
	5.92243	1.48198
	5.92808	1.60927
	5.92815	1.62449
	5.93241	1.66023
	5.9346	1.68916
	5.93555	1.70272
	5.93584	1.82562
	5.94123	1.84235
	5.94471	1.84969
	5.94657	1.85182
	5.9497	1.86489
	5.95042	1.93555
	5.95585	1.9699
	5.95611	1.98281
	5.95696	1.98807
	5.95868	2.02903
	5.9609	2.04286
	5.96293	2.06383
	5.96533	2.06733
	5.96634	2.07005
	5.97066	2.09122
	5.97278	2.13463
	5.97568	2.13681
	5.97846	2.13811
	5.98163	2.1419
	5.98456	2.16078
	5.98528	2.1781
	5.98633	2.19475
	5.98743	2.22346
	5.98855	2.2461
	5.98888	2.29042
	5.9901	2.33346
	5.99351	2.34567
	5.99375	2.3524
	5.99683	2.35255
	5.9974	2.36675
	5.99808	2.40647
	5.9981	2.40878
	5.99902	2.41468
	6.00011	2.45763
	6.00181	2.46222
	6.00255	2.47692
	6.00547	2.47946
	6.00766	2.49791
	6.01034	2.53242
	6.01048	2.5699
	6.0118	2.57029
	6.01476	2.58732
	6.01493	2.58751
	6.01532	2.63847
	6.02108	2.66273
	6.02151	2.67108
	6.02169	2.67533
	6.02247	2.69451
	6.02678	2.70769
	6.03164	2.71669
	6.03499	2.72501
	6.03551	2.73446
	6.03623	2.79676
	6.03884	2.82071
	6.03901	2.82752
	6.04144	2.83216
	6.04497	2.85227
	6.04823	2.85629
	6.04928	2.86351
	6.05047	2.93706
	6.05223	2.94361
	6.05345	2.97463
	6.05403	2.98476
	6.05681	2.99708
	6.06041	3.01416
	6.06074	3.01418
	6.0618	3.02109
	6.06215	3.04146
	6.06696	3.06406
	6.07027	3.06498
	6.07035	3.07381
	6.07095	3.08217
	6.07253	3.09613
	6.07433	3.13735
	6.07461	3.14615
	6.07514	3.16489
	6.07949	3.18785
	6.08163	3.18845
	6.08357	3.18938
	6.08584	3.19596
	6.09125	3.26738
	6.09215	3.27229
	6.09432	3.29121
	6.09578	3.30548
	6.09983	3.34413
	6.10343	3.38099
	6.10788	3.39964
	6.10802	3.40329
	6.10974	3.40422
	6.11161	3.40671
	6.11327	3.40869
	6.1157	3.41061
	6.11783	3.4363
	6.12099	3.45378
	6.12316	3.46279
	6.12473	3.48106
	6.12542	3.49541
	6.12802	3.52011
	6.12824	3.52027
	6.13008	3.53001
	6.13076	3.54469
	6.13167	3.57557
	6.13202	3.58839
	6.13313	3.59838
	6.13357	3.6005
	6.13389	3.61926
	6.1353	3.62371
	6.13633	3.62585
	6.13668	3.62928
	6.13686	3.63925
	6.13802	3.6538
	6.13852	3.66309
	6.13956	3.67215
	6.14006	3.67798
	6.14486	3.67893
	6.14608	3.69494
	6.14905	3.69624
	6.15244	3.70615
	6.15264	3.70949
	6.15332	3.74108
	6.15383	3.78446
	6.15582	3.79424
	6.15862	3.7955
	6.16167	3.80756
	6.16383	3.80917
	6.16571	3.83502
	6.16735	3.84153
	6.16781	3.84494
	6.16957	3.847
	6.16983	3.85525
	6.17021	3.86411
	6.17024	3.86544
	6.1704	3.86799
	6.17251	3.8804
	6.1756	3.8978
	6.18093	3.91482
	6.18102	3.91986
	6.18449	3.93591
	6.18694	3.94568
	6.18825	3.94614
	6.18891	3.97594
	6.18959	3.99378
	6.19659	4.00126
	6.19975	4.01078
	6.19991	4.03702
	6.20007	4.04315
	6.20141	4.04551
	6.2034	4.05739
	6.20628	4.05811
	6.20677	4.07184
	6.20838	4.09003
	6.20854	4.0934
	6.20888	4.09865
	6.21296	4.12533
	6.21319	4.15086
	6.21405	4.16088
	6.21946	4.17164
	6.22595	4.17709
	6.22677	4.20846
	6.22704	4.23987
	6.22746	4.26507
	6.23264	4.27232
	6.23275	4.32324
	6.23522	4.33202
	6.23625	4.33726
	6.23762	4.35579
	6.24038	4.36933
	6.24159	4.40185
	6.24392	4.40448
	6.25019	4.41889
	6.25289	4.45138
	6.25391	4.46686
	6.25585	4.46835
	6.25884	4.46961
	6.26062	4.47187
	6.26259	4.48753
	6.266	4.49306
	6.26817	4.50116
	6.26858	4.50304
	6.26879	4.53713
	6.26987	4.54351
	6.27018	4.57069
	6.27096	4.57966
	6.27107	4.58382
	6.27185	4.58531
	6.27199	4.61875
	6.27337	4.62536
	6.27375	4.64954
	6.27866	4.65984
	6.27892	4.66937
	6.27915	4.67134
	6.28429	4.68676
	6.28618	4.70719
	6.28756	4.71071
	6.29114	4.74215
	6.29123	4.75757
	6.29558	4.78554
	6.29572	4.80059
	6.2983	4.80261
	6.30064	4.8283
	6.30162	4.8345
	6.30197	4.83492
	6.30526	4.85441
	6.30549	4.863
	6.30622	4.87085
	6.30828	4.87128
	6.31245	4.88548
	6.31499	4.88926
	6.31572	4.89716
	6.31747	4.89787
	6.31902	4.90488
	6.32317	4.922
	6.32728	4.92648
	6.33177	4.92746
	6.33828	4.93014
	6.34105	4.93192
	6.34278	4.95289
	6.34544	4.96187
	6.34796	4.96883
	6.3517	4.98128
	6.35222	4.98489
	6.35821	5.01601
	6.35908	5.04876
	6.35994	5.05898
	6.36217	5.0755
	6.36591	5.0817
	6.37502	5.08267
	6.37694	5.09744
	6.37901	5.1142
	6.3794	5.12109
	6.38252	5.12794
	6.383	5.13385
	6.38505	5.14388
	6.38554	5.14679
	6.38908	5.16076
	6.38982	5.16689
	6.38987	5.18177
	6.40491	5.19167
	6.40881	5.20172
	6.41164	5.27017
	6.41621	5.27206
	6.42247	5.27406
	6.42249	5.28484
	6.4285	5.31954
	6.44201	5.3295
	6.44671	5.37812
	6.44884	5.38065
	6.44953	5.39143
	6.45056	5.40541
	6.46054	5.42548
	6.46317	5.4259
	6.46505	5.44865
	6.46607	5.45266
	6.47279	5.45346
	6.47425	5.4543
	6.48019	5.46245
	6.48047	5.46673
	6.48082	5.51855
	6.48108	5.53505
	6.48435	5.54111
	6.48715	5.54364
	6.49259	5.54904
	6.49387	5.63128
	6.49589	5.64253
	6.50119	5.65109
	6.5032	5.69044
	6.50356	5.69769
	6.50756	5.70962
	6.50794	5.72947
	6.51203	5.7524
	6.51234	5.77754
	6.51301	5.7851
	6.51488	5.8342
	6.52018	5.8372
	6.52201	5.87111
	6.53371	5.88891
	6.53667	5.92383
	6.53909	5.94954
	6.54188	5.99151
	6.544	5.99298
	6.54587	6.05112
	6.54789	6.05876
	6.55008	6.06357
	6.55576	6.09854
	6.55755	6.1132
	6.55764	6.18217
	6.56793	6.187
	6.56945	6.22001
	6.57486	6.30159
	6.57974	6.31069
	6.58004	6.31949
	6.58767	6.32289
	6.5896	6.32789
	6.59311	6.32928
	6.5944	6.34149
	6.5954	6.34749
	6.59831	6.35689
	6.60293	6.36778
	6.60641	6.37158
	6.61867	6.37859
	6.61985	6.38689
	6.62558	6.40358
	6.62619	6.41798
	6.62863	6.43149
	6.62983	6.44829
	6.63236	6.45939
	6.63752	6.46209
	6.63932	6.47128
	6.64442	6.48118
	6.65132	6.49929
	6.65323	6.50539
	6.66375	6.51208
	6.66794	6.51708
	6.67308	6.52039
	6.67567	6.53399
	6.68802	6.54659
	6.69616	6.56409
	6.70301	6.57219
	6.71651	6.58118
	6.7171	6.59868
	6.71792	6.60748
	6.72304	6.60848
	6.72727	6.60898
	6.73246	6.63549
	6.7342	6.64438
	6.74381	6.66448
	6.74698	6.78429
	6.74762	6.79089
	6.74768	6.81278
	6.74986	6.81869
	6.75443	6.82079
	6.75953	6.92868
	6.7605	6.94219
	6.77468	6.95118
	6.77542	6.95789
	6.79663	6.98858
	6.80219	7.03169
	6.80244	7.16618
	6.80281	7.19579
	6.81109	7.22419
	6.81701	7.28989
	6.8249	7.29448
	6.83551	7.31229
	6.83816	7.33718
	6.84199	7.35248
	6.8465	7.35548
	6.87427	7.38919
	6.87717	7.40458
	6.88201	7.41089
	6.88394	7.42699
	6.8862	7.42978
	6.89121	7.45549
	6.89803	7.49019
	6.89874	7.49268
	6.92685	7.55408
	6.93494	7.56909
	6.94888	7.63528
	6.94918	7.64238
	6.95024	7.64518
	6.95548	7.67789
	6.95589	7.69198
	6.95781	7.73829
	6.96099	7.75748
	6.97697	7.76389
	6.98266	7.79908
	6.98844	7.82348
	7.00203	7.89919
	7.01217	7.99779
	7.01436	8.01168
	7.03126	8.21368
	7.05919	8.36579
	7.05924	8.37149
	7.06675	8.38998
	7.06797	2.3529
	7.07436	2.4315
	7.07571	2.4598
	7.07952	2.5546
	7.08047	2.6473
	7.08846	2.6658
	7.11551	2.7445
	7.12881	2.7844
	7.13902	2.803
	7.14208	2.8034
	7.14622	2.8238
	7.16479	2.8305
	7.16767	2.871
	7.18133	2.9471
	7.19557	2.986
	7.1961	3.0354
	7.19799	3.0562
	7.20277	3.0739
	7.20358	3.0748
	7.22866	3.0845
	7.2305	3.0961
	7.23567	3.1072
	7.23895	3.1682
	7.24861	3.1758
	7.25128	3.261
	7.25273	3.2739
	7.27904	3.3096
	7.30598	3.344
	7.32683	3.3461
	7.34136	3.3669
	7.35588	3.4159
	7.36932	3.4272
	7.37537	3.471
	7.38955	3.5372
	7.40558	3.5448
	7.43723	3.5458
	7.4409	3.5465
	7.45197	3.5549
	7.48423	3.5593
	7.50221	3.5756
	7.52729	3.587
	7.54184	3.5893
	7.55149	3.5966
	7.55841	3.6021
	7.58142	3.6194
	7.60026	3.6328
	7.60637	3.6364
	7.63312	3.6993
	7.63734	3.7002
	7.65605	3.704
	7.65615	3.7096
	7.66702	3.7401
	7.67078	3.7933
	7.70179	3.7974
	7.70759	3.8515
	7.71237	3.8909
	7.73996	3.9255
	7.75408	3.9487
	7.7787	4.0135
	7.80113	4.0305
	7.83775	4.0702
	7.85864	4.0808
	7.85995	4.0929
	7.86293	4.1037
	7.88728	4.1218
	7.90932	4.1287
	7.94414	4.1294
	7.9616	4.1934
	7.96373	4.2159
	7.98055	4.2229
	7.9893	4.2364
	7.99237	4.2498
	8.02301	4.2505
	8.043	4.2587
	8.05171	4.2776
	8.05291	4.2921
	8.0558	4.3111
	8.06495	4.3258
	8.09153	4.3326
	8.12272	4.4157
	8.18843	4.4456
	8.19652	4.4586
	8.22384	4.4675
	8.26298	4.4782
	8.28383	4.4807
	8.2928	4.5252
	8.36272	4.5412
	8.38635	4.5479
	8.39794	4.553
	8.40155	4.5559
	8.40889	4.573
	8.44216	4.5795
	8.44409	4.5857
	8.4466	4.6066
	8.45456	4.6345
	8.4964	4.6472
	8.51512	4.6556
	8.57931	4.6933
	8.59136	4.6945
	8.63734	4.7056
	8.64498	4.7067
	8.6659	4.7154
	8.66792	4.7274
	8.68086	4.7298
	8.72294	4.7319
	2.52175	4.7334
	2.52947	4.7351
	2.54401	4.7369
	2.55736	4.7646
	2.56905	4.7726
	2.57161	4.7799
	2.57346	4.7814
	2.58041	4.7989
	2.59952	4.8071
	2.6112	4.8385
	2.64663	4.8419
	2.66095	4.8504
	2.69202	4.8551
	2.70228	4.856
	2.77707	4.8632
	2.7856	4.8689
	2.79081	4.885
	2.81691	4.8889
	2.88633	4.8956
	2.88698	4.8983
	2.88966	4.9001
	2.93127	4.9061
	2.97121	4.9283
	2.97251	4.9317
	2.97383	4.9346
	2.99	4.9798
	3.0337	5.004
	3.03595	5.0054
	3.05174	5.0095
	3.07945	5.029
	3.10127	5.033
	3.11207	5.0337
	3.13277	5.0352
	3.17347	5.036
	3.18792	5.0384
	3.19288	5.059
	3.21863	5.0639
	3.22614	5.0643
	3.2266	5.0871
	3.22907	5.1043
	3.25889	5.1335
	3.27147	5.1697
	3.27314	5.1722
	3.27654	5.1724
	3.31872	5.1836
	3.32006	5.2018
	3.33643	5.2063
	3.34247	5.217
	3.36713	5.2174
	3.37109	5.2181
	3.38726	5.2392
	3.40829	5.2463
	3.41597	5.2515
	3.43371	5.2564
	3.44064	5.2576
	3.45149	5.2651
	3.47107	5.2718
	3.49471	5.2731
	3.52317	5.28
	3.53965	5.2838
	3.55546	5.3158
	3.56923	5.3336
	3.58432	5.3484
	3.59752	5.3606
	3.59773	5.369
	3.60311	5.377
	3.60708	5.3821
	3.62488	5.3883
	3.62827	5.4044
	3.67407	5.4058
	3.67566	5.4168
	3.67619	5.4357
	3.68006	5.4383
	3.68763	5.4576
	3.70447	5.4918
	3.7072	5.4988
	3.71021	5.4993
	3.7407	5.5181
	3.74705	5.5234
	3.74774	5.5249
	3.76612	5.5275
	3.78034	5.5329
	3.78248	5.5346
	3.7832	5.5532
	3.80259	5.568
	3.80279	5.5767
	3.80679	5.6063
	3.81759	5.6207
	3.82821	5.6294
	3.8308	5.6333
	3.83564	5.6385
	3.85337	5.6575
	3.85584	5.6581
	3.8593	5.6611
	3.8616	5.6687
	3.86467	5.7004
	3.87535	5.7025
	3.89379	5.7075
	3.91336	5.7132
	3.91408	5.7345
	3.91866	5.7451
	3.92215	5.7668
	3.92566	5.775
	3.92919	5.7798
	3.93286	5.7841
	3.94035	5.7845
	3.94046	5.7894
	3.94648	5.7909
	3.96491	5.7948
	3.96736	5.8022
	3.97243	5.8134
	3.9731	5.8247
	4.00642	5.837
	4.01883	5.8393
	4.03101	5.8532
	4.03188	5.8552
	4.03245	5.8739
	4.03497	5.8806
	4.03579	5.8864
	4.03595	5.8993
	4.03753	5.9238
	4.03883	5.9249
	4.04059	5.9284
	4.04116	5.9319
	4.0433	5.9484
	4.0622	5.9516
	4.06359	5.9521
	4.07421	5.9527
	4.08464	5.9536
	4.08636	5.9758
	4.08717	5.9927
	4.09301	6.0209
	4.09502	6.0371
	4.10053	6.0406
	4.10676	6.0787
	4.1108	6.0835
	4.11703	6.0908
	4.12332	6.098
	4.12417	6.1049
	4.13557	6.1356
	4.15222	6.148
	4.15631	6.1531
	4.15762	6.161
	4.1773	6.1659
	4.18644	6.1797
	4.19601	6.2517
	4.21846	6.30089
	4.2284	6.32458
	4.22974	6.33279
	4.23407	6.38068
	4.24016	6.47168
	4.24413	6.48299
	4.25282	6.52818
	4.25306	6.59448
	4.25793	6.62789
	4.27484	6.62929
	4.27891	6.64149
	4.28109	6.65358
	4.28582	0.4235
	4.28624	0.4324
	4.29138	0.4999
	4.30148	0.5201
	4.31206	0.5258
	4.32005	0.545
	4.32035	0.5733
	4.34614	0.5836
	4.35518	0.5966
	4.35777	0.6315
	4.3659	0.6376
	4.36698	0.645
	4.37451	0.6581
	4.38062	0.6671
	4.38283	0.7506
	4.38438	0.7618
	4.38574	0.7931
	4.38621	0.8106
	4.39755	0.8437
	4.40657	0.8563
	4.40857	0.8855
	4.40988	0.8866
	4.41625	0.892
	4.41644	0.9032
	4.42392	0.9145
	4.42405	0.9339
	4.431	0.9726
	4.43597	0.9924
	4.44341	1.0025
	4.45693	1.0258
	4.46741	1.0338
	4.47098	1.0385
	4.47213	1.0881
	4.48842	1.0937
	4.49538	1.1375
	4.49693	1.1403
	4.49704	1.1406
	4.50157	1.1416
	4.51052	1.1681
	4.51153	1.1776
	4.53004	1.1787
	4.53187	1.1946
	4.53729	1.2566
	4.5415	1.2627
[truncated: 3,882 more rows]
