# Supplementary material for: TrpV1 receptor activation rescues neuronal function and network gamma oscillations from Aβ-induced impairment in mouse hippocampus in vitro
Source: eLife. 2018 Nov 12;7:e37703. doi: 10.7554/eLife.37703 (PMC6281315; doi:10.7554/eLife.37703)
Supplement: Figure 4—figure supplement 1—source data 1. [file elife-37703-fig4-figsupp1-data1.xlsx]

## Sheet: Sheet1
	Gamma Power Time Course (Normalized)								Gama Power Quantification
	Time (min)	Cp 10 microM							Ctrl	Abeta +Cp (15 min)	Abeta +Cp (30 min)
		n1	n2	n3	n4	n5	n6		0.364681	0.272498	0.234065
	-5	1.0503	0.915108	0.933861	1.00211	1.26937	0.855045		1.91499	0.958673	0.403632
	-4	0.840723	0.893185	0.936506	1.07335	1.25666	0.986569		0.251361	0.252528	0.329063
	-3	0.855741	1.04126	1.0023	0.828689	0.903589	0.999482		7.16044	2.3491	1.92294
	-2	1.14033	0.995174	0.991009	1.17024	0.663139	1.05273		1.23317	0.874996	0.898418
	-1	1.1129	1.15528	1.13633	0.925605	0.907242	1.10617		2.98298	1.86526	0.852721
	0	0.997951	1.18805	1.07771	0.71189	0.703476	1.14003
	1	0.922258	1.08431	1.05787	0.751556	0.836346	1.09904
	2	0.697853	1.09341	1.05831	0.482899	0.723306	0.837122
	3	0.675998	1.05678	1.01963	0.445327	0.946124	0.860567
	4	0.745209	1.09112	1.13458	0.847131	0.869836	0.969223
	5	0.688584	0.824235	1.14514	0.76359	0.907141	1.16313
	6	0.848501	0.860832	1.07934	0.708493	0.770222	1.11294
	7	0.863488	0.883263	1.18626	0.494522	0.848375	1.1369
	8	0.76341	0.787506	1.11434	0.543823	0.709256	1.07206
	9	0.770841	0.732815	1.18917	0.326286	0.857316	1.07636
	10	0.731239	0.754662	1.05584	0.450602	0.644441	0.847631
	11	0.798505	0.820231	0.959527	0.637044	0.855172	0.911322
	12	0.796079	0.739956	1.00668	0.381956	0.679324	0.592812
	13	0.773449	0.625784	0.917844	0.258743	0.770378	0.665038
	14	0.710391	0.605379	0.986168	0.439803	0.590169	0.544852
	15	0.754158	0.632498	1.10982	0.25319	0.764313	0.754319
	16	0.729344	0.451854	1.03219	0.329799	0.610962	0.540916
	17	0.768778	0.187567	0.977203	0.358795	0.811915	0.621373
	18	0.673309	0.174132	1.02086	0.392927	1.00154	0.435665
	19	0.621637	0.1676	1.02051	0.382026	0.924672	0.53639
	20	0.671721	0.144556	1.2282	0.545315	0.633154	0.337751
	21	0.695317	0.163685	1.26174	0.75593	0.684947	0.401362
	22	0.628333	0.195582	1.20366	0.910003	0.538911	0.356081
	23	0.647759	0.170174	1.19484	0.517889	0.653578	0.395411
	24	0.709703	0.156113	1.21014	0.284679	0.636692	0.316427
	25	0.62687	0.27681	1.3585	0.344013	0.648525	0.314652
	26	0.603065	0.264083	1.32018	0.298735	0.939754	0.30546
	27	0.603255	0.197118	1.30982	0.192718	0.857706	0.3447
	28	0.669227	0.161641	1.38058	0.298083	0.608143	0.288368
	29	0.650521	0.260362	1.2625	0.256264	0.63104	0.25691
	30	0.683107	0.170674	1.27254	0.296952	0.606061	0.233874
