# Supplementary material for: TrpV1 receptor activation rescues neuronal function and network gamma oscillations from Aβ-induced impairment in mouse hippocampus in vitro
Source: eLife. 2018 Nov 12;7:e37703. doi: 10.7554/eLife.37703 (PMC6281315; doi:10.7554/eLife.37703)
Supplement: Figure 4—source data 1. [file elife-37703-fig4-data1.xlsx]

## Sheet: WT-Gamma & AP Firing
	WT Gamma Power			WT AP Firing			WT Membrane Potential
	Control	Abeta +Cp		Control	Abeta +Cp		Control	Abeta +Cp
	5.91092	5.09901		0.603333	0.836667		-41.6214	-38.4464
	0.390423	0.68781		1.32667	1		-43.6619	-44.5752
	1.48043	2.05241		1.66	0.663333		-45.4838	-48.6448
	0.292302	0.23415		0.29	0.18		-45.5207	-43.2911
	0.540965	0.545217		0.2	0.61		-45.2032	-43.9868
	1.73373	0.770837		1.09	0.186667		-39.5382	-34.3361
	4.59203	3.04769
	7.63591	8.45288

## Sheet: WT-Spike Phase Analysis
	AP Phase angle quantification			WT Gaussian fit half-width
	Control	Abeta +Cp		Control	Abeta +Cp
	6.28578	6.28468		3.09659	1.8669
	6.28989	6.28829		4.65783	3.12485
	6.29669	6.30229		5.35957	5.89647
	6.29999	6.30239		5.14764	6.30385
	6.30089	6.30239		1.62035	2.43724
	6.30279	6.30598
	6.30488	6.30748
	6.31438	6.31088
	6.31499	6.31288
	6.32388	6.31419
	6.32569	6.31989
	6.33099	6.32149
	6.34638	6.32679
	6.35708	6.33268
	6.35959	6.34068
	6.36329	6.34239
	6.36439	6.34338
	6.36618	6.34448
	6.37209	6.34668
	6.37889	6.34699
	6.38178	6.34828
	6.38329	6.35058
	6.39368	6.35079
	6.39489	6.35178
	6.39569	6.35759
	6.40078	6.35858
	6.40348	6.36099
	6.40388	6.36259
	6.40588	6.36399
	6.41019	6.36789
	6.42159	6.37059
	6.42328	6.37329
	6.42708	6.38509
	6.42948	6.38679
	6.43679	6.38758
	6.44658	6.39759
	6.44669	6.40029
	6.44768	6.40399
	6.45008	6.40719
	6.45268	6.41618
	6.45958	6.42148
	6.46218	6.42448
	6.47309	6.42849
	6.48269	6.42938
	6.48848	6.43149
	6.48949	6.44069
	6.48998	6.44778
	6.49069	6.44799
	6.49289	6.45038
	6.49969	6.45048
	6.50209	6.45809
	6.50718	6.46488
	6.50838	6.46729
	6.52269	6.47488
	6.53139	6.47928
	6.53569	6.48139
	6.53829	6.48168
	6.54558	6.48318
	6.54798	6.48958
	6.55219	6.50598
	6.55359	6.50718
	6.55528	6.50988
	6.55858	6.51079
	6.56719	6.51128
	6.57268	6.51128
	6.57369	6.51488
	6.57449	6.51619
	6.57679	6.51738
	6.57939	6.52069
	6.57998	6.52489
	6.58348	6.52559
	6.59389	6.52689
	6.59509	6.52738
	6.59579	6.53238
	6.60818	6.53238
	6.60848	6.54429
	6.62239	6.54678
	6.62359	6.55868
	6.62378	6.55989
	6.62399	6.57188
	6.63018	6.57418
	6.63079	6.57878
	6.63849	6.58038
	6.65008	6.58158
	6.65369	6.59129
	6.65778	6.59568
	6.66578	6.60288
	6.66929	6.60379
	6.67279	6.61559
	6.67589	6.62158
	6.67969	6.62878
	6.67978	6.63699
	6.68529	6.64828
	6.68799	6.65299
	6.69348	6.66779
	6.70179	6.67758
	6.70498	6.67959
	6.71558	6.68009
	6.71669	6.68288
	6.72748	6.68419
	6.72759	6.68429
	6.74929	6.68828
	6.75178	6.69149
	6.76249	6.69248
	6.76788	6.70629
	6.77339	6.70779
	6.77549	6.72309
	6.77599	6.72669
	6.78508	6.73698
	6.78599	6.74029
	6.79429	6.74059
	6.80239	6.75759
	6.80488	6.76269
	6.81339	6.76738
	6.81398	6.77459
	6.84058	6.77848
	6.84378	6.79298
	6.84528	6.79608
	6.84588	6.80098
	6.84819	6.83118
	6.85219	6.84309
	6.86249	6.84419
	6.86329	6.84749
	6.86369	6.84929
	6.86909	6.85628
	6.86989	6.86109
	6.87268	6.86238
	6.87319	6.86878
	6.89419	6.87009
	6.89499	6.87198
	6.89639	6.87388
	6.89649	6.89048
	6.90109	6.89328
	6.90168	6.90639
	6.90369	6.91188
	6.92209	6.91498
	6.93178	6.93598
	6.93769	6.93708
	6.93769	6.94829
	6.94559	6.95568
	6.95029	6.95629
	6.95219	6.96178
	6.95678	6.96188
	6.95789	6.96249
	6.95819	6.96249
	6.96619	6.97508
	6.96678	6.98238
	6.97249	7.00148
	6.97889	7.01288
	6.98398	7.01368
	6.98449	7.01828
	6.99669	7.03209
	6.99688	7.04108
	6.99969	7.04748
	7.00138	7.05049
	7.00659	7.05229
	7.01668	7.07658
	7.04538	7.09169
	7.06168	7.09809
	7.06438	7.11209
	7.06548	7.11808
	7.06939	7.11909
	7.07238	7.11959
	7.07899	7.12009
	7.08699	7.12378
	7.08749	7.12798
	7.10119	7.13218
	7.10708	7.14208
	7.11069	7.14799
	7.11158	7.15428
	7.12099	7.15859
	7.12749	7.15888
	7.15289	7.15999
	7.15979	7.16268
	7.16078	7.17849
	7.16349	7.18489
	7.17689	7.18799
	7.19369	7.19008
	7.20179	7.19299
	7.20899	7.19669
	7.20918	7.19738
	7.21178	7.20979
	7.21199	7.22558
	7.22058	7.22739
	7.22068	7.23728
	7.22739	7.25729
	7.22879	7.25999
	7.22928	7.26028
	7.23089	7.26839
	7.23259	7.27799
	7.23288	7.29049
	7.24008	7.30309
	7.24188	7.31919
	7.24459	7.32299
	7.25448	7.33549
	7.25498	7.34868
	7.27029	7.35428
	7.27499	7.35489
	7.27679	7.38148
	7.29298	7.38448
	7.29339	7.40679
	7.30368	7.40918
	7.31729	7.41008
	7.32369	7.41979
	7.32489	7.43159
	7.34119	7.43379
	7.34868	7.44008
	7.35489	7.44168
	7.36048	7.44859
	7.36249	7.45528
	7.36588	7.46908
	7.37179	7.47518
	7.38708	7.47818
	7.38879	7.50038
	7.39449	7.51358
	7.39848	7.52139
	7.39909	7.54629
	7.40018	7.55438
	7.40229	7.57449
	7.40238	7.58498
	7.41249	7.58509
	7.41329	7.59079
	7.41779	7.59459
	7.42969	7.59929
	7.43109	7.60119
	7.43489	7.60239
	7.44189	7.61658
	7.46389	7.61819
	7.46429	7.62249
	7.47818	7.62268
	7.47879	7.66469
	7.47909	7.66709
	7.48789	7.67119
	7.49069	7.67138
	7.50608	7.67558
	7.52048	7.69979
	7.53048	7.70329
	7.54129	7.71309
	7.54589	7.72408
	7.55989	7.76138
	7.56318	7.76269
	7.57658	7.77588
	7.57928	7.78348
	7.58209	7.79289
	7.58598	7.80018
	7.58918	7.81698
	7.59849	7.82278
	7.60008	7.85048
	7.60519	7.85589
	7.61358	7.86059
	7.61669	7.86278
	7.62019	7.87399
	7.62089	7.88018
	7.62678	7.88488
	7.62929	7.89839
	7.63809	7.90348
	7.63948	7.91179
	7.65648	7.93729
	7.66378	7.94329
	7.66718	7.95279
	7.69238	7.95289
	7.69529	7.95838
	7.69569	7.96729
	7.71458	8.03659
	7.71988	8.08159
	7.73529	8.12719
	7.73848	8.13129
	7.73989	8.14378
	7.74829	8.14828
	7.74979	8.16299
	7.75068	8.16619
	7.75669	8.17459
	7.75729	8.17689
	7.75788	8.18389
	7.76488	8.20318
	7.77379	8.20478
	7.79148	8.25219
	7.80968	8.25529
	7.81428	8.27158
	7.81518	8.27989
	7.82179	8.29359
	7.82939	8.30879
	7.83788	8.31559
	7.84359	8.32849
	7.86038	8.33198
	7.86369	8.33249
	7.86939	8.33979
	7.88459	8.34638
	7.88749	8.34808
	7.89449	8.35279
	7.89879	8.36458
	7.92429	8.38649
	7.92938	8.39609
	7.93279	8.39959
	7.93968	8.39968
	7.94189	8.41759
	7.94198	8.43558
	7.95728	8.45039
	7.96509	8.45219
	7.96739	8.45649
	7.96809	8.46528
	7.96868	8.49169
	7.96978	8.49338
	7.97018	8.50048
	7.97919	8.53679
	7.98379	2.304
	8.00519	2.3274
	8.01039	2.3295
	8.02349	2.3358
	8.02739	2.3514
	8.03618	2.3597
	8.06009	2.3709
	8.06799	2.3784
	8.07949	2.3815
	8.08108	2.3861
	8.09248	2.3992
	8.09379	2.4086
	8.10159	2.4142
	8.10798	2.4215
	8.11069	2.4387
	8.13499	2.4669
	8.14308	2.47
	8.14629	2.4786
	8.15569	2.4847
	8.16108	2.4905
	8.18198	2.4927
	8.19869	2.5055
	8.20359	2.5075
	8.22228	2.5172
	8.22339	2.5444
	8.23659	2.5901
	8.25559	2.6088
	8.28929	2.6253
	8.29548	2.6276
	8.29569	2.6421
	8.30928	2.6584
	8.31419	2.6628
	8.33099	2.672
	8.33459	2.6727
	8.37178	2.7043
	8.37779	2.7246
	8.39349	2.7458
	8.40128	2.7714
	8.40678	2.7853
	8.44778	2.7859
	8.44859	2.7875
	8.45899	2.7887
	8.46158	2.7962
	8.47259	2.8591
	8.47768	2.8614
	8.47828	2.8757
	8.48138	2.8859
	8.49079	2.8889
	8.49559	2.9055
	8.50519	2.9171
	8.50749	2.9194
	8.51239	2.9222
	8.51488	2.9224
	8.52188	2.9319
	8.52998	2.9493
	8.53378	2.957
	8.54398	2.9623
	8.55749	2.9691
	8.57278	2.9695
	8.57799	2.9779
	2.301	2.9812
	2.3021	2.9862
	2.3021	3.007
	2.3033	3.0136
	2.3037	3.0137
	2.3287	3.0292
	2.3295	3.0456
	2.3404	3.1187
	2.3619	3.1305
	2.3776	3.1413
	2.3836	3.1555
	2.3906	3.1568
	2.399	3.1625
	2.4009	3.1647
	2.4018	3.1717
	2.4042	3.1791
	2.4147	3.1945
	2.4236	3.2032
	2.4238	3.2088
	2.4283	3.2172
	2.4425	3.2247
	2.4467	3.2301
	2.4855	3.2392
	2.4942	3.2476
	2.5075	3.2572
	2.513	3.2698
	2.5144	3.2711
	2.5161	3.2719
	2.5314	3.2756
	2.5332	3.2802
	2.5366	3.2823
	2.545	3.2868
	2.5457	3.2879
	2.5469	3.2955
	2.5517	3.3097
	2.5575	3.3146
	2.5575	3.3195
	2.5872	3.3271
	2.5911	3.3273
	2.5999	3.3304
	2.6148	3.3622
	2.6153	3.3838
	2.636	3.3958
	2.6431	3.397
	2.6502	3.4078
	2.6702	3.4103
	2.6823	3.4226
	2.6864	3.4285
	2.692	3.4563
	2.6926	3.4646
	2.6995	3.4801
	2.6995	3.5088
	2.7034	3.5109
	2.7111	3.5156
	2.7287	3.5193
	2.7394	3.5203
	2.7401	3.5241
	2.7539	3.5388
	2.7592	3.55
	2.7762	3.5648
	2.777	3.5678
	2.7789	3.5789
	2.8075	3.579
	2.8093	3.5872
	2.8119	3.5914
	2.8232	3.5984
	2.8252	3.5984
	2.8294	3.6002
	2.8464	3.623
	2.8479	3.6328
	2.8544	3.6346
	2.8557	3.6583
	2.856	3.6798
	2.8923	3.7022
	2.8939	3.7077
	2.8999	3.7122
	2.9	3.7428
	2.9252	3.7454
	2.9266	3.7591
	2.9353	3.7633
	2.9633	3.7734
	2.9681	3.783
	2.9895	3.7876
	3.0192	3.7939
	3.0224	3.7977
	3.0285	3.8153
	3.0368	3.8236
	3.0403	3.8248
	3.0588	3.8255
	3.0634	3.8364
	3.0817	3.8435
	3.0859	3.851
	3.1014	3.8692
	3.1025	3.8726
	3.1145	3.8768
	3.1151	3.8827
	3.1354	3.8901
	3.1437	3.8912
	3.1481	3.9008
	3.1542	3.9015
	3.1555	3.9194
	3.1689	3.9221
	3.1717	3.931
	3.1785	3.9373
	3.1812	3.9381
	3.1829	3.9385
	3.1925	3.9449
	3.1995	3.9592
	3.2222	3.9632
	3.224	3.9634
	3.2473	3.966
	3.2532	3.9678
	3.2611	3.9807
	3.2671	3.9815
	3.2789	3.9921
	3.2823	3.996
	3.2859	3.9962
	3.2877	4.0117
	3.2929	4.0159
	3.2932	4.0166
	3.3008	4.021
	3.301	4.0384
	3.3041	4.0447
	3.3107	4.0612
	3.3117	4.0632
	3.3197	4.064
	3.3317	4.0652
	3.3317	4.0828
	3.3336	4.0959
	3.3373	4.1014
	3.3533	4.1035
	3.358	4.1099
	3.3603	4.1152
	3.3616	4.1202
	3.3657	4.1244
	3.3897	4.125
	3.3905	4.1365
	3.4004	4.141
	3.4067	4.1454
	3.4191	4.1499
	3.4312	4.1526
	3.4329	4.1696
	3.4379	4.1754
	3.4442	4.1769
	3.4443	4.1804
	3.445	4.1858
	3.458	4.1926
	3.463	4.2071
	3.4666	4.2166
	3.4684	4.2192
	3.4693	4.2209
	3.4809	4.221
	3.4822	4.2229
	3.4847	4.2232
	3.4887	4.2248
	3.5164	4.2487
	3.5201	4.2487
	3.549	4.2495
	3.552	4.2531
	3.5548	4.259
	3.5966	4.2794
	3.5996	4.2987
	3.6206	4.3052
	3.6269	4.3112
	3.6329	4.3134
	3.6429	4.3229
	3.6433	4.3306
	3.6491	4.3381
	3.6549	4.3542
	3.656	4.3558
	3.662	4.3562
	3.6623	4.3575
	3.6635	4.3652
	3.6689	4.3711
	3.7045	4.372
	3.7118	4.3721
	3.7154	4.3735
	3.7185	4.3793
	3.7292	4.3852
	3.7362	4.3854
	3.7411	4.3941
	3.7539	4.4021
	3.7605	4.4063
	3.7612	4.4087
	3.7621	4.4188
	3.7676	4.4222
	3.778	4.4267
	3.7791	4.4321
	3.783	4.4333
	3.7884	4.4358
	3.8025	4.4366
	3.8213	4.4378
	3.8223	4.4398
	3.8278	4.4514
	3.8297	4.4651
	3.8314	4.4735
	3.833	4.4737
	3.834	4.4763
	3.8408	4.4771
	3.8575	4.4776
	3.8595	4.4842
	3.8616	4.4844
	3.866	4.4975
	3.8771	4.4981
	3.8774	4.4993
	3.887	4.5032
	3.9032	4.5065
	3.9081	4.5077
	3.9101	4.5098
	3.9118	4.5195
	3.9167	4.5242
	3.9192	4.5271
	3.9242	4.5294
	3.9325	4.5335
	3.9379	4.5369
	3.9418	4.5428
	3.9462	4.5429
	3.947	4.5431
	3.9506	4.548
	3.9598	4.5485
	3.9693	4.5497
	3.9714	4.5528
	3.979	4.554
	3.9822	4.5545
	3.9825	4.5549
	3.9848	4.5594
	3.993	4.5696
	3.9934	4.5711
	4.0056	4.5729
	4.0296	4.5733
	4.0304	4.5743
	4.0486	4.5763
	4.0497	4.5822
	4.0701	4.5841
	4.0787	4.5893
	4.0824	4.5933
	4.0861	4.6023
	4.0869	4.607
	4.0942	4.6076
	4.0972	4.6109
	4.099	4.6134
	4.1032	4.6147
	4.1049	4.6195
	4.106	4.6269
	4.1092	4.627
	4.1211	4.6432
	4.1221	4.647
	4.1331	4.648
	4.1356	4.656
	4.1456	4.6574
	4.1563	4.6607
	4.1603	4.6646
	4.1612	4.6649
	4.1635	4.6779
	4.1767	4.6814
	4.1869	4.6853
	4.1883	4.688
	4.1902	4.6883
	4.1948	4.6889
	4.1991	4.7073
	4.2107	4.7149
	4.2278	4.7161
	4.2378	4.7164
	4.247	4.717
	4.2601	4.7192
	4.2608	4.7197
	4.2633	4.7237
	4.2649	4.7272
	4.2694	4.7281
	4.2695	4.7345
	4.2699	4.7359
	4.2713	4.7363
	4.2768	4.7365
	4.2873	4.7462
	4.2892	4.7514
	4.2903	4.7534
	4.295	4.7612
	4.2975	4.7639
	4.3062	4.7679
	4.3072	4.7694
	4.3089	4.7695
	4.3091	4.7704
	4.3122	4.7716
	4.3164	4.7728
	4.317	4.7746
	4.3189	4.7762
	4.3206	4.7804
	4.3291	4.7825
	4.3339	4.7843
	4.334	4.785
	4.3372	4.7861
	4.3448	4.7947
	4.3462	4.7989
	4.3532	4.7999
	4.354	4.8135
	4.3592	4.8198
	4.3599	4.8208
	4.3665	4.8235
	4.3676	4.8318
	4.3734	4.8329
	4.3791	4.841
	4.3795	4.8413
	4.3831	4.8431
	4.3832	4.8473
	4.3848	4.8501
	4.393	4.8533
	4.4021	4.8589
	4.4027	4.8612
	4.4043	4.8662
	4.4075	4.8697
	4.4195	4.8704
	4.4244	4.8707
	4.431	4.876
	4.4339	4.8761
	4.4372	4.8785
	4.4497	4.8803
	4.4539	4.8844
	4.4586	4.894
	4.4589	4.8991
	4.4601	4.9025
	4.4641	4.9055
	4.4642	4.9073
	4.4696	4.9147
	4.4753	4.9162
	4.4777	4.9236
	4.4794	4.9327
	4.4804	4.9413
	4.4808	4.9415
	4.4821	4.9429
	4.4967	4.9488
	4.4998	4.9494
	4.502	4.9523
	4.5035	4.9528
	4.506	4.9546
	4.5124	4.9563
	4.5132	4.9571
	4.5195	4.9586
	4.5284	4.9707
	4.5302	4.971
	4.5329	4.9717
	4.534	4.9734
	4.5415	4.9739
	4.5507	4.9805
	4.552	4.9854
	4.5615	4.9866
	4.5648	4.9888
	4.5708	4.9899
	4.5722	4.9917
	4.5813	4.9983
	4.5841	4.9998
	4.5907	5.0014
	4.5966	5.0016
	4.6007	5.0043
	4.6071	5.0058
	4.609	5.0064
	4.6153	5.0066
	4.6168	5.007
	4.6177	5.0103
	4.6231	5.0124
	4.6277	5.0141
	4.6291	5.0142
	4.6294	5.0162
	4.6312	5.0186
	4.632	5.0207
	4.6324	5.0229
	4.6327	5.0271
	4.635	5.0347
	4.6354	5.0354
	4.6357	5.0368
	4.6409	5.0396
	4.6451	5.045
	4.6623	5.0592
	4.6742	5.0627
	4.6777	5.0629
	4.6811	5.0713
	4.6837	5.0783
	4.6839	5.0802
	4.688	5.0819
	4.6903	5.087
	4.6988	5.0944
	4.7018	5.0958
	4.7106	5.0964
	4.7108	5.0979
	4.7163	5.1118
	4.72	5.113
	4.7204	5.1139
	4.7206	5.1206
	4.7221	5.121
	4.7242	5.1294
	4.7245	5.1299
	4.7254	5.131
	4.7302	5.1357
	4.7317	5.1394
	4.7337	5.141
	4.7356	5.1444
	4.7367	5.1501
	4.737	5.1516
	4.7428	5.1572
	4.7445	5.1578
	4.7456	5.1599
	4.7518	5.1604
	4.752	5.1632
	4.752	5.1668
	4.7611	5.1695
	4.7631	5.1708
	4.7686	5.1719
	4.7695	5.1741
	4.7703	5.175
	4.7796	5.1772
	4.7814	5.1795
	4.7861	5.181
	4.7865	5.1831
	4.7911	5.1875
	4.7917	5.1923
	4.8038	5.1937
	4.8049	5.1955
	4.8059	5.1969
	4.807	5.1975
	4.8093	5.202
	4.8112	5.2031
	4.8138	5.209
	4.8191	5.2094
	4.8229	5.2097
	4.8362	5.2106
	4.837	5.2163
	4.8394	5.2195
	4.844	5.2199
	4.8455	5.2202
	4.8499	5.2268
	4.8507	5.2287
	4.8621	5.2288
	4.8712	5.2313
	4.8729	5.2317
	4.8781	5.2388
	4.8817	5.2411
	4.8868	5.2448
	4.8895	5.2451
	4.8934	5.2461
	4.8953	5.2467
	4.8961	5.2471
	4.8992	5.2519
	4.9096	5.2519
	4.9154	5.2533
	4.9174	5.2585
	4.9202	5.2588
	4.9217	5.2592
	4.9296	5.2727
	4.9327	5.2836
	4.9355	5.2891
	4.9402	5.2927
	4.9418	5.2956
	4.9453	5.2983
	4.946	5.3066
	4.9549	5.314
	4.9616	5.3179
	4.9635	5.32
	4.9702	5.3205
	4.9717	5.3242
	4.9766	5.3304
	4.9938	5.338
	4.9947	5.3394
	4.9981	5.3425
	4.999	5.3449
	5.0058	5.3456
	5.0073	5.3469
	5.0077	5.3516
	5.016	5.3532
	5.0163	5.3535
	5.0187	5.356
	5.0205	5.3604
	5.0274	5.3635
	5.0274	5.3636
	5.032	5.3672
	5.034	5.3679
	5.0396	5.372
	5.0437	5.372
	5.0497	5.3761
	5.0506	5.3823
	5.0601	5.3828
	5.0602	5.3833
	5.0608	5.3885
	5.0637	5.3911
	5.0658	5.3982
	5.0707	5.4004
	5.0735	5.4015
	5.0857	5.4078
	5.0886	5.4091
	5.0903	5.4116
	5.094	5.413
	5.0946	5.4133
	5.1015	5.4133
	5.1027	5.4191
	5.1027	5.4218
	5.104	5.4256
	5.1205	5.4318
	5.1224	5.4365
	5.1227	5.4406
	5.1285	5.4501
	5.1287	5.4543
	5.1323	5.4544
	5.1325	5.4551
	5.1459	5.4592
	5.1572	5.4678
	5.1581	5.4684
	5.1683	5.4721
	5.1784	5.4721
	5.1794	5.4779
	5.1809	5.4801
	5.1809	5.4807
	5.182	5.4819
	5.189	5.4825
	5.1899	5.4904
	5.1917	5.4966
	5.2012	5.5076
	5.2067	5.5076
	5.21	5.5091
	5.2122	5.5092
	5.2157	5.5126
	5.2159	5.5153
	5.2165	5.5263
	5.2166	5.5267
	5.2275	5.5296
	5.2297	5.5316
	5.23	5.5346
	5.2336	5.5461
	5.2355	5.5503
	5.2367	5.5511
	5.24	5.5522
	5.2441	5.5533
	5.2442	5.5573
	5.2518	5.5617
	5.2522	5.5715
	5.2534	5.5718
	5.2635	5.5771
	5.2637	5.581
	5.2638	5.5841
	5.266	5.5875
	5.2845	5.5899
	5.2931	5.6011
	5.3013	5.6045
	5.3052	5.6152
	5.3066	5.6197
	5.3074	5.6219
	5.3232	5.6227
	5.3271	5.6232
	5.3313	5.6253
	5.3349	5.6254
	5.3355	5.6268
	5.3366	5.627
	5.3376	5.6294
	5.3398	5.6294
	5.3421	5.6302
	5.3439	5.6415
	5.3464	5.6449
	5.3532	5.6517
	5.3557	5.6563
	5.3576	5.6702
	5.362	5.6723
	5.3632	5.6731
	5.3648	5.6754
	5.3658	5.6774
	5.369	5.6779
	5.3762	5.6927
	5.3791	5.6955
	5.3804	5.701
	5.3811	5.7036
	5.3816	5.7074
	5.3877	5.7177
	5.395	5.7201
	5.3961	5.7238
	5.3992	5.7257
	5.3996	5.727
	5.404	5.7331
	5.4088	5.7333
	5.4117	5.7357
	5.4152	5.7381
	5.4188	5.7384
	5.4223	5.7402
	5.4257	5.7463
	5.4262	5.7464
	5.4275	5.748
	5.4278	5.7533
	5.4282	5.7537
	5.436	5.7537
	5.4384	5.7664
	5.4398	5.7675
	5.4407	5.7697
	5.4423	5.7726
	5.4445	5.7751
	5.4493	5.7787
	5.4522	5.7805
	5.4527	5.7826
	5.4546	5.7858
	5.467	5.7882
	5.4705	5.7917
	5.4728	5.7931
	5.4818	5.7988
	5.483	5.8087
	5.4991	5.8258
	5.5153	5.8288
	5.5157	5.8315
	5.5168	5.8356
	5.517	5.8399
	5.5189	5.841
	5.5206	5.854
	5.5208	5.8595
	5.5231	5.8608
	5.5263	5.8619
	5.5276	5.8676
	5.529	5.8696
	5.5292	5.8715
	5.5422	5.8727
	5.5449	5.8747
	5.5476	5.877
	5.5482	5.8797
	5.553	5.8832
	5.5542	5.8837
	5.5555	5.8865
	5.5624	5.8872
	5.5756	5.8932
	5.5761	5.8939
	5.5801	5.9085
	5.5875	5.9088
	5.592	5.9208
	5.5957	5.9261
	5.5994	5.9307
	5.6042	5.9371
	5.6061	5.947
	5.6071	5.9486
	5.6075	5.9543
	5.6127	5.9569
	5.62	5.9593
	5.6225	5.9598
	5.6243	5.9642
	5.6247	5.9651
	5.6259	5.9652
	5.6278	5.9692
	5.628	5.9753
	5.6361	5.9816
	5.6367	5.9821
	5.6428	5.9828
	5.6455	5.9918
	5.6505	5.9969
	5.6517	5.9987
	5.6604	6.003
	5.6634	6.0057
	5.6647	6.0305
	5.6695	6.035
	5.6727	6.0417
	5.6733	6.0437
	5.6741	6.0508
	5.6778	6.0604
	5.6803	6.0625
	5.6824	6.0652
	5.683	6.0656
	5.6862	6.0696
	5.6885	6.073
	5.6977	6.0786
	5.6978	6.0828
	5.7002	6.0859
	5.7014	6.0862
	5.7131	6.0886
	5.714	6.0932
	5.7146	6.1025
	5.7169	6.1091
	5.7204	6.1096
	5.7217	6.1202
	5.7273	6.125
	5.7292	6.125
	5.7314	6.1255
	5.7347	6.1301
	5.736	6.1301
	5.7413	6.1301
	5.7414	6.1309
	5.7439	6.1311
	5.7453	6.139
	5.753	6.1417
	5.7555	6.1534
	5.7571	6.1579
	5.7583	6.1592
	5.7621	6.161
	5.7628	6.1666
	5.7648	6.1723
	5.7679	6.1776
	5.7689	6.1864
	5.769	6.1865
	5.7731	6.1884
	5.7747	6.1891
	5.7796	6.191
	5.7798	6.1984
	5.7839	6.1987
	5.7839	6.1988
	5.7843	6.2144
	5.7894	6.2215
	5.7896	6.2357
	5.7952	6.236
	5.7963	6.2384
	5.7974	6.2437
	5.7977	6.244
	5.8026	6.246
	5.8048	6.2469
	5.8055	6.2519
	5.8065	6.2544
	5.8071	6.2547
	5.8077	6.2565
	5.8153	6.2609
	5.8167	6.2675
	5.8204
	5.8223
	5.826
	5.8307
	5.8308
	5.8315
	5.8332
	5.8365
	5.84
	5.8469
	5.848
	5.8585
	5.8599
	5.8621
	5.8719
	5.8735
	5.8754
	5.8765
	5.8766
	5.8832
	5.8876
	5.888
	5.8899
	5.8905
	5.8912
	5.8934
	5.894
	5.9024
	5.9061
	5.9204
	5.9255
	5.9302
	5.9342
	5.9364
	5.9395
	5.9475
	5.9481
	5.95
	5.9544
	5.9552
	5.9577
	5.9612
	5.9653
	5.9706
	5.9764
	5.9769
	5.9887
	5.9918
	6.0005
	6.0011
	6.0012
	6.0014
	6.0028
	6.0044
	6.0071
	6.0176
	6.0183
	6.0196
	6.0241
	6.0251
	6.0259
	6.0339
	6.0382
	6.0433
	6.0436
	6.0491
	6.0519
	6.0591
	6.0612
	6.0613
	6.0625
	6.0659
	6.066
	6.0672
	6.072
	6.0773
	6.0917
	6.0918
	6.1025
	6.1027
	6.1049
	6.1063
	6.1097
	6.1118
	6.1144
	6.1156
	6.1168
	6.1222
	6.1234
	6.1294
	6.134
	6.1344
	6.1351
	6.1352
	6.1403
	6.1481
	6.1494
	6.1523
	6.1533
	6.1564
	6.1578
	6.1589
	6.16
	6.1639
	6.1649
	6.1654
	6.171
	6.1731
	6.1736
	6.1769
	6.1776
	6.1886
	6.1909
	6.1921
	6.1992
	6.2032
	6.207
	6.2079
	6.2155
	6.2176
	6.2192
	6.22
	6.2238
	6.2262
	6.2312
	6.2443
	6.2443
	6.2513
	6.2573
	6.2583
	6.2639
	6.2642
	6.2739
	6.2767
	6.2796

## Sheet: TrpV1 KO-Gamma & AP Firing
	TrpV1 Gamma Power			TrpV1 AP Firing			TrpV1 Membrane Potential
	Control	Abeta +Cp		Control	Abeta +Cp		Control	Abeta +Cp
	0.305498	0.16984		1.28333	0.453333		-45.2261	-45.6094
	1.21499	0.211466		1.64	0.143333		-41.0863	-37.3422
	0.636855	0.303449		0.283333	0.233333		-39.8462	-40.6843
	1.1756	0.675341		3.30333	0.0166667		-46.3218	-47.748
	3.08415	2.41611		0.0666667	0.0533333		-36.8295	-49.9537
	0.490923	0.103269		1.19667	0.146667		-41.1567	-40.8693

## Sheet: TrpV1 KO-Spike Phase Analysis
	AP Phase angle quantification			TrpV1 Gaussian fit half-width
	Control	Abeta +Cp		Control	Abeta +Cp
	6.28359	6.29129		3.54636	4.19393
	6.28458	6.30079		3.67823	6.4263
	6.28599	6.31888		6.28031	8.34313
	6.28688	6.34338		2.70804	6.59821
	6.28808	6.34799		5.22535	2.01832
	6.29118	6.37589		4.05736	2.4914
	6.29218	6.44759
	6.29709	6.44979
	6.29739	6.46328
	6.29788	6.46908
	6.29889	6.46969
	6.30219	6.51249
	6.30229	6.59699
	6.30518	6.62099
	6.30668	6.63539
	6.30968	6.65139
	6.31069	6.70929
	6.31288	6.71978
	6.31569	6.72229
	6.31609	6.72599
	6.31639	6.73219
	6.31738	6.73459
	6.32019	6.80108
	6.32988	6.84478
	6.33108	6.86588
	6.33129	6.88749
	6.33158	6.93909
	6.33509	6.94958
	6.33819	6.96859
	6.34018	6.99148
	6.34089	7.05408
	6.34218	7.06888
	6.34438	7.07639
	6.34948	7.10278
	6.34969	7.10449
	6.35178	7.10729
	6.35349	7.13009
	6.35438	7.18379
	6.35508	7.25809
	6.36168	7.27939
	6.36219	7.29619
	6.36529	7.31829
	6.36829	7.32698
	6.36918	7.35599
	6.37059	7.36719
	6.37509	7.39489
	6.37678	7.40548
	6.38199	7.41118
	6.38199	7.43419
	6.38288	7.44388
	6.38679	7.46938
	6.38718	7.47469
	6.38749	7.57388
	6.38788	7.57909
	6.39229	7.59349
	6.39269	7.60719
	6.39408	7.61728
	6.39738	7.65078
	6.40029	7.68379
	6.40388	7.71488
	6.40658	7.71499
	6.40929	7.75068
	6.41099	7.78179
	6.41139	7.82499
	6.41378	7.88528
	6.42478	7.90348
	6.42729	7.91758
	6.42789	7.92049
	6.42859	7.92558
	6.43529	7.94588
	6.43788	7.94848
	6.43828	7.95549
	6.44118	7.95809
	6.44339	8.05779
	6.44358	8.07668
	6.44449	8.14008
	6.44489	8.25309
	6.44749	8.26109
	6.44808	8.27519
	6.44949	8.31569
	6.44958	8.31688
	6.45169	8.37069
	6.45568	8.42279
	6.45739	8.44078
	6.45979	8.49079
	6.46258	8.53378
	6.46488	8.55298
	6.46849	8.55768
	6.47208	2.293
	6.47299	2.2999
	6.47669	2.3186
	6.47769	2.3553
	6.47839	2.366
	6.47889	2.4021
	6.48069	2.4094
	6.48118	2.4203
	6.48198	2.4811
	6.48409	2.4838
	6.48658	2.4981
	6.48778	2.5489
	6.49048	2.5542
	6.49059	2.5621
	6.49069	2.598
	6.49088	2.6094
	6.49509	2.6214
	6.49538	2.6609
	6.49698	2.696
	6.50078	2.7178
	6.50479	2.838
	6.50598	2.8646
	6.50629	2.8799
	6.50678	2.8962
	6.50718	2.94
	6.50919	2.9474
	6.51058	3.0159
	6.51459	3.0541
	6.51579	3.1276
	6.51689	3.1411
	6.51938	3.1519
	6.52168	3.1553
	6.52358	3.1583
	6.52428	3.1639
	6.52858	3.1957
	6.53088	3.2203
	6.53118	3.232
	6.53158	3.2673
	6.53599	3.2776
	6.53629	3.2848
	6.53658	3.2859
	6.53869	3.3076
	6.54078	3.3341
	6.54498	3.3345
	6.54498	3.3706
	6.55049	3.4075
	6.55659	3.5197
	6.55759	3.5566
	6.55938	3.557
	6.55968	3.603
	6.56168	3.6087
	6.56189	3.6542
	6.56808	3.7017
	6.57418	3.7104
	6.57538	3.7718
	6.58019	3.7946
	6.58028	3.795
	6.58249	3.7964
	6.58258	3.8233
	6.58418	3.8973
	6.58908	3.9586
	6.58939	3.9677
	6.58999	3.9745
	6.59169	3.9855
	6.59258	3.9986
	6.59309	4.0032
	6.59459	4.0097
	6.59649	4.023
	6.59849	4.061
	6.59988	4.079
	6.60309	4.0819
	6.60628	4.1024
	6.60738	4.1058
	6.60738	4.1171
	6.60799	4.1233
	6.60919	4.1783
	6.60959	4.2037
	6.60989	4.213
	6.62009	4.3045
	6.62629	4.3274
	6.62808	4.3315
	6.62819	4.3507
	6.62939	4.358
	6.62939	4.3635
	6.63049	4.3643
	6.63119	4.365
	6.63558	4.3652
	6.63879	4.4096
	6.64098	4.4423
	6.64489	4.4552
	6.64898	4.4817
	6.65208	4.5021
	6.65559	4.5032
	6.65829	4.5053
	6.67218	4.5192
	6.67359	4.5272
	6.67528	4.5517
	6.67638	4.5533
	6.67638	4.5534
	6.68419	4.5569
	6.68719	4.5652
	6.69358	4.5882
	6.69379	4.6014
	6.69719	4.6664
	6.69759	4.7038
	6.69878	4.7549
	6.70129	4.7624
	6.70388	4.7677
	6.70608	4.7751
	6.70678	4.7779
	6.70939	4.7841
	6.71108	4.8091
	6.71108	4.8148
	6.71249	4.8158
	6.71359	4.8183
	6.72119	4.8228
	6.72748	4.8811
	6.73229	4.8836
	6.73379	4.8928
	6.73498	4.8978
	6.73639	4.8998
	6.73759	4.9082
	6.73899	4.9188
	6.74728	4.9196
	6.74819	4.9253
	6.74929	4.9274
	6.75108	4.929
	6.75829	4.95
	6.75859	4.9582
	6.76039	4.9609
	6.76089	4.9647
	6.76319	4.976
	6.76419	4.9821
	6.76438	4.9952
	6.76488	5.0229
	6.76718	5.0283
	6.76858	5.0486
	6.76938	5.0573
	6.77039	5.0632
	6.77348	5.0799
	6.77459	5.0833
	6.78399	5.0906
	6.78709	5.0916
	6.79298	5.1085
	6.79779	5.1352
	6.80258	5.1394
	6.80338	5.1444
	6.80448	5.1623
	6.80459	5.1792
	6.80539	5.1866
	6.80588	5.1871
	6.81008	5.1919
	6.81358	5.2038
	6.81478	5.2069
	6.81589	5.2342
	6.81649	5.2629
	6.82318	5.2634
	6.82329	5.2687
	6.82429	5.2808
	6.82639	5.2923
	6.83089	5.3036
	6.83439	5.3132
	6.83498	5.3218
	6.84039	5.3431
	6.84049	5.3438
	6.84208	5.3563
	6.84679	5.3723
	6.84679	5.3792
	6.84758	5.3984
	6.84948	5.4221
	6.85668	5.4245
	6.85719	5.4297
	6.85729	5.4303
	6.85909	5.4362
	6.86268	5.4367
	6.86329	5.4465
	6.86569	5.4747
	6.86648	5.481
	6.87118	5.4903
	6.87839	5.4932
	6.87849	5.4941
	6.87929	5.5056
	6.87939	5.5099
	6.88068	5.5138
	6.88499	5.5195
	6.89119	5.5214
	6.89499	5.5288
	6.89679	5.5316
	6.89729	5.5398
	6.89828	5.5729
	6.89928	5.578
	6.90008	5.5971
	6.90029	5.599
	6.90059	5.6121
	6.90578	5.6157
	6.90789	5.6307
	6.90929	5.6585
	6.91049	5.666
	6.91139	5.6689
	6.91329	5.6957
	6.91378	5.6966
	6.91469	5.7028
	6.91918	5.7029
	6.91918	5.7298
	6.92309	5.7304
	6.92378	5.7655
	6.92459	5.7716
	6.92649	5.7777
	6.92938	5.7786
	6.93478	5.7831
	6.93478	5.7857
	6.93638	5.7967
	6.93649	5.848
	6.93788	5.8584
	6.94308	5.8644
	6.94398	5.8759
	6.94869	5.8859
	6.95289	5.8979
	6.95618	5.9012
	6.95838	5.9156
	6.96729	5.9327
	6.97778	5.9362
	6.98318	5.9421
	6.98738	5.9491
	6.99039	5.9705
	6.99939	5.9955
	7.00078	6.0006
	7.00099	6.0021
	7.00129	6.0024
	7.00319	6.0164
	7.00418	6.0279
	7.00518	6.0308
	7.00669	6.0384
	7.00838	6.0385
	7.00938	6.0413
	7.01098	6.0413
	7.01668	6.0414
	7.02018	6.0419
	7.02409	6.0464
	7.03758	6.0765
	7.04078	6.0835
	7.05039	6.086
	7.05239	6.1524
	7.05359	6.182
	7.05588	6.1942
	7.06328	6.2025
	7.06649	6.2554
	7.06659	6.2712
	7.06698
	7.06789
	7.06839
	7.07079
	7.07648
	7.08678
	7.08869
	7.09149
	7.09978
	7.10368
	7.10489
	7.10978
	7.11939
	7.12348
	7.13309
	7.13568
	7.13809
	7.13929
	7.14909
	7.15308
	7.16019
	7.16108
	7.18168
	7.18909
	7.19419
	7.19489
	7.19759
	7.19878
	7.20139
	7.20238
	7.20329
	7.20678
	7.21129
	7.21349
	7.21369
	7.21448
	7.22109
	7.23468
	7.23548
	7.24519
	7.24798
	7.25148
	7.25999
	7.26189
	7.26968
	7.27029
	7.27199
	7.27459
	7.28078
	7.28749
	7.29659
	7.29769
	7.30009
	7.30588
	7.30689
	7.30709
	7.31238
	7.31558
	7.31569
	7.31649
	7.32918
	7.33439
	7.33729
	7.34319
	7.34668
	7.34729
	7.34839
	7.35379
	7.36899
	7.37268
	7.37498
	7.38018
	7.38039
	7.38488
	7.39079
	7.39449
	7.40198
	7.40379
	7.40778
	7.41008
	7.41008
	7.41049
	7.41568
	7.41739
	7.42119
	7.42298
	7.42499
	7.44329
	7.44419
	7.44829
	7.44869
	7.45498
	7.46568
	7.46948
	7.46959
	7.47319
	7.47379
	7.47619
	7.48189
	7.48369
	7.48918
	7.49029
	7.49278
	7.49779
	7.49988
	7.51529
	7.51968
	7.52158
	7.52259
	7.52679
	7.53238
	7.53299
	7.53329
	7.53439
	7.53928
	7.54228
	7.54258
	7.54598
	7.55098
	7.55408
	7.56008
	7.57648
	7.57869
	7.57988
	7.58319
	7.60079
	7.60599
	7.60748
	7.60919
	7.61008
	7.61139
	7.62899
	7.63129
	7.63279
	7.64018
	7.64048
	7.64138
	7.64999
	7.65078
	7.65348
	7.66409
	7.66448
	7.66739
	7.68468
	7.68668
	7.68999
	7.69658
	7.70048
	7.70958
	7.71659
	7.73379
	7.73548
	7.73569
	7.74059
	7.74219
	7.74679
	7.74779
	7.75059
	7.75148
	7.75399
	7.75629
	7.76529
	7.76548
	7.76999
	7.77098
	7.77278
	7.77369
	7.77639
	7.77958
	7.77989
	7.78909
	7.79258
	7.80729
	7.81058
	7.81508
	7.82369
	7.83659
	7.83838
	7.84378
	7.85989
	7.86198
	7.86789
	7.87308
	7.88319
	7.88619
	7.89248
	7.89839
	7.91008
	7.91049
	7.91338
	7.91568
	7.91589
	7.92098
	7.92439
	7.93168
	7.93408
	7.93869
	7.93959
	7.94168
	7.94168
	7.94489
	7.94918
	7.95148
	7.95458
	7.96809
	7.97049
	7.98299
	7.98709
	7.98989
	8.00629
	8.00728
	8.01239
	8.02669
	8.03449
	8.03468
	8.03959
	8.04168
	8.04468
	8.06249
	8.06508
	8.06818
	8.06828
	8.07348
	8.07439
	8.08368
	8.08518
	8.08578
	8.08709
	8.09028
	8.09999
	8.10179
	8.10289
	8.10488
	8.10618
	8.11089
	8.12688
	8.12758
	8.12869
	8.14239
	8.14939
	8.15839
	8.16699
	8.17299
	8.20899
	8.21538
	8.21719
	8.21858
	8.22459
	8.23508
	8.24138
	8.25508
	8.26679
	8.27279
	8.27579
	8.27609
	8.27939
	8.28768
	8.29209
	8.29608
	8.30918
	8.31039
	8.31189
	8.31758
	8.31799
	8.32038
	8.33038
	8.33699
	8.34558
	8.34839
	8.36398
	8.37369
	8.38189
	8.39068
	8.40029
	8.41029
	8.41479
	8.41658
	8.41668
	8.43959
	8.44369
	8.44568
	8.45238
	8.46179
	8.46789
	8.47409
	8.47709
	8.49399
	8.49559
	8.50059
	8.50258
	8.50379
	8.51018
	8.51749
	8.52158
	8.52279
	8.52669
	8.52689
	8.54168
	8.55998
	8.56479
	8.57009
	8.57818
	8.57968
	8.58289
	8.58888
	2.3116
	2.3362
	2.345
	2.3469
	2.3502
	2.3663
	2.3708
	2.3717
	2.38
	2.3826
	2.3839
	2.3908
	2.396
	2.4037
	2.4077
	2.4104
	2.4117
	2.4217
	2.4242
	2.4282
	2.4346
	2.4495
	2.4523
	2.4788
	2.4954
	2.4955
	2.4972
	2.5018
	2.5056
	2.5132
	2.5189
	2.5237
	2.5334
	2.5371
	2.54
	2.5411
	2.5558
	2.5563
	2.5587
	2.5655
	2.5679
	2.5827
	2.601
	2.6104
	2.6136
	2.64
	2.6445
	2.6464
	2.6489
	2.6546
	2.6573
	2.6612
	2.6661
	2.6668
	2.6673
	2.6815
	2.6819
	2.6905
	2.7136
	2.7144
	2.7348
	2.7478
	2.7714
	2.7719
	2.7765
	2.7811
	2.7827
	2.7848
	2.7988
	2.8154
	2.8197
	2.8198
	2.8235
	2.8313
	2.8327
	2.838
	2.8381
	2.8473
	2.851
	2.8801
	2.8819
	2.8846
	2.8848
	2.8891
	2.8915
	2.8919
	2.8942
	2.9213
	2.9387
	2.9461
	2.952
	2.9584
	2.9588
	2.9603
	2.9706
	2.9813
	2.9872
	2.99
	2.993
	2.9985
	3.0052
	3.0068
	3.0118
	3.0205
	3.0327
	3.0428
	3.0449
	3.0533
	3.0573
	3.0632
	3.0635
	3.0652
	3.0926
	3.0969
	3.1163
	3.1188
	3.1206
	3.1259
	3.129
	3.1296
	3.1337
	3.1365
	3.1374
	3.1414
	3.1541
	3.1567
	3.1599
	3.1657
	3.1702
	3.1711
	3.1737
	3.1794
	3.1803
	3.1813
	3.1884
	3.1895
	3.19
	3.191
	3.2097
	3.2218
	3.2231
	3.2364
	3.2388
	3.2441
	3.2482
	3.253
	3.2562
	3.2586
	3.2594
	3.2651
	3.2659
	3.267
	3.2685
	3.2701
	3.2704
	3.2737
	3.281
	3.2814
	3.2893
	3.294
	3.2977
	3.3119
	3.3145
	3.3193
	3.3203
	3.3446
	3.3466
	3.3545
	3.3567
	3.3579
	3.3661
	3.3706
	3.3787
	3.382
	3.3859
	3.391
	3.3983
	3.4032
	3.4073
	3.4078
	3.4089
	3.4125
	3.4176
	3.4352
	3.4356
	3.4415
	3.4434
	3.445
	3.4513
	3.4769
	3.4799
	3.4805
	3.4857
	3.4865
	3.4873
	3.4926
	3.4926
	3.4945
	3.495
	3.4987
	3.506
	3.5185
	3.525
	3.5334
	3.5359
	3.5398
	3.5434
	3.554
	3.5594
	3.5637
	3.573
	3.5735
	3.5754
	3.5767
	3.5812
	3.5859
	3.5896
	3.592
	3.6044
	3.6154
	3.6165
	3.6252
	3.6256
	3.6267
	3.6311
	3.6432
	3.647
	3.6503
	3.6624
	3.6723
	3.676
	3.6777
	3.6822
	3.6842
	3.6853
	3.6866
	3.6867
	3.6876
	3.6895
	3.693
	3.6978
	3.703
	3.7054
	3.7054
	3.7066
	3.7068
	3.7143
	3.7148
	3.7215
	3.7219
	3.7271
	3.7306
	3.7356
	3.7384
	3.746
	3.7461
	3.7491
	3.7505
	3.7511
	3.7549
	3.7583
	3.7691
	3.7734
	3.7774
	3.7859
	3.7863
	3.7875
	3.7937
	3.7949
	3.7981
	3.799
	3.8073
	3.8113
	3.8143
	3.8143
	3.8159
	3.8227
	3.8262
	3.8305
	3.832
	3.8334
	3.8355
	3.838
	3.8382
	3.8435
	3.8471
	3.8474
	3.8482
	3.8514
	3.8536
	3.8539
	3.8578
	3.8583
	3.8584
	3.859
	3.8635
	3.8649
	3.8669
	3.8764
	3.886
	3.8909
	3.8912
	3.9002
	3.9045
	3.9106
	3.9133
	3.9171
	3.924
	3.9254
	3.9256
	3.9266
	3.9286
	3.9309
	3.9383
	3.9464
	3.9471
	3.9482
	3.9509
	3.9518
	3.9545
	3.9553
	3.9556
	3.9609
	3.962
	3.9645
	3.9655
	3.9685
	3.969
	3.9699
	3.9705
	3.9793
	3.9793
	3.9806
	3.9854
	3.9869
	3.9876
	3.9912
	4.0018
	4.0018
	4.0083
	4.0085
	4.0088
	4.0092
	4.0175
	4.0193
	4.0271
	4.0286
	4.0301
	4.0416
	4.042
	4.0444
	4.0455
	4.0517
	4.0532
	4.0553
	4.062
	4.0662
	4.0686
	4.073
	4.0744
	4.0746
	4.0852
	4.0857
	4.0867
	4.089
	4.0909
	4.0938
	4.095
	4.1027
	4.1035
	4.1063
	4.1077
	4.1082
	4.1108
	4.1119
	4.1131
	4.114
	4.1158
	4.1162
	4.123
	4.1307
	4.1321
	4.1396
	4.1459
	4.1506
	4.1516
	4.1529
	4.1536
	4.1565
	4.157
	4.1616
	4.1625
	4.1649
	4.1699
	4.1739
	4.1752
	4.1755
	4.1796
	4.1814
	4.1828
	4.1847
	4.1861
	4.1874
	4.1902
	4.192
	4.1982
	4.1985
	4.1994
	4.201
	4.202
	4.2049
	4.2066
	4.2068
	4.2083
	4.2097
	4.2107
	4.2116
	4.2142
	4.2162
	4.2169
	4.2179
	4.226
	4.2277
	4.2298
	4.2338
	4.2348
	4.235
	4.2378
	4.2383
	4.2403
	4.244
	4.2451
	4.2467
	4.2491
	4.2516
	4.2522
	4.2531
	4.254
	4.2544
	4.2566
	4.2593
	4.2599
	4.2615
	4.2717
	4.2736
	4.2751
	4.2797
	4.282
	4.2822
	4.2831
	4.2863
	4.2909
	4.2927
	4.2937
	4.2942
	4.2973
	4.2988
	4.3002
	4.3029
	4.303
	4.3092
	4.3136
	4.3162
	4.3163
	4.3235
	4.3236
	4.3258
	4.3335
	4.3344
	4.3349
	4.336
	4.3366
	4.3372
	4.3383
	4.3433
	4.3442
	4.3457
	4.3459
	4.3519
	4.3542
	4.3583
	4.3621
	4.3628
	4.3651
	4.3652
	4.366
	4.3666
	4.3706
	4.3781
	4.3795
	4.3864
	4.3902
	4.3903
	4.3905
	4.391
	4.3935
	4.3957
	4.3972
	4.3999
	4.4003
	4.4005
	4.4014
	4.4025
	4.4026
	4.4172
	4.4179
	4.4243
	4.4246
	4.4276
	4.4293
	4.4313
	4.4314
	4.4436
	4.4451
	4.4455
	4.4465
	4.4465
	4.447
	4.4482
	4.4546
	4.4548
	4.4569
	4.457
	4.458
	4.4581
	4.4587
	4.4601
	4.4615
	4.4627
	4.4644
	4.4684
	4.4691
	4.4708
	4.472
	4.4738
	4.4756
	4.4786
	4.4809
	4.4835
	4.4862
	4.4871
	4.4894
	4.4927
	4.4944
	4.4992
	4.5046
	4.5099
	4.5106
	4.5115
	4.5125
	4.5136
	4.5141
	4.5143
	4.5159
	4.5189
	4.5217
	4.5251
	4.5252
	4.5262
	4.5302
	4.5308
	4.5322
	4.5354
	4.5361
	4.5384
	4.5401
	4.5412
	4.546
	4.546
	4.5482
	4.5492
	4.55
	4.5539
	4.5571
	4.5579
	4.5587
	4.5618
	4.5623
	4.5639
	4.5688
	4.5716
	4.5722
	4.5774
	4.5777
	4.5792
	4.5808
	4.5816
	4.5821
	4.5837
	4.5852
	4.5874
	4.5894
	4.5919
	4.592
	4.5954
	4.5964
	4.5971
	4.6005
	4.6024
	4.6025
	4.6033
	4.6041
	4.6087
	4.6091
	4.6095
	4.6124
	4.6126
	4.6127
	4.6138
	4.6202
	4.6209
	4.6223
	4.6229
	4.6238
	4.6254
	4.6256
	4.6272
	4.6299
	4.6317
	4.636
	4.6405
	4.6406
	4.6412
	4.6476
	4.6534
	4.6537
	4.6542
	4.6561
	4.6637
	4.6668
	4.6684
	4.6684
	4.6685
	4.671
	4.6724
	4.6738
	4.6752
	4.6754
	4.6755
	4.6783
	4.681
	4.6817
	4.6818
	4.683
	4.6834
	4.6906
	4.6909
	4.6914
	4.692
	4.6943
	4.6989
	4.6996
	4.6999
	4.7006
	4.7018
	4.7027
	4.7125
	4.7153
	4.7168
	4.7205
	4.7215
	4.7215
	4.7249
	4.725
	4.726
	4.7261
	4.7282
	4.7287
	4.729
	4.7299
	4.73
	4.7305
	4.7306
	4.7339
	4.7343
	4.7375
	4.7408
	4.741
	4.7419
	4.7423
	4.743
	4.7436
	4.7436
	4.7452
	4.7497
	4.75
	4.7503
	4.7503
	4.7511
	4.7587
	4.762
	4.7631
	4.764
	4.7674
	4.7691
	4.7696
	4.7706
	4.7708
	4.7708
	4.7748
	4.7761
	4.7782
	4.7824
	4.7825
	4.7827
	4.786
	4.7878
	4.7882
	4.7937
	4.7958
	4.7961
	4.7974
	4.7979
	4.7998
	4.8002
	4.8033
	4.8049
	4.8052
	4.8059
	4.8062
	4.8081
	4.8116
	4.8119
	4.8128
	4.8129
	4.8157
	4.816
	4.8161
	4.8183
	4.8187
	4.8199
	4.8221
	4.8228
	4.8279
	4.8297
	4.8298
	4.8306
	4.8334
	4.8343
	4.8351
	4.836
	4.8373
	4.8382
	4.8401
	4.8407
	4.8418
	4.8437
	4.8466
	4.8499
	4.8518
	4.8518
	4.852
	4.8528
	4.8537
	4.8558
	4.8562
	4.8563
	4.8565
	4.8636
	4.8655
	4.8732
	4.8734
	4.8777
	4.8783
	4.8793
	4.8813
	4.8814
	4.8825
	4.8838
	4.885
	4.8852
	4.8859
	4.8872
	4.8875
	4.8903
	4.8923
	4.8941
	4.8959
	4.8963
	4.8977
	4.8981
	4.899
	4.9009
	4.901
	4.902
	4.903
	4.9036
	4.9095
	4.9106
	4.9133
	4.9175
	4.9196
	4.9206
	4.9222
	4.9237
	4.924
	4.9306
	4.9307
	4.9348
	4.9396
	4.9397
	4.9427
	4.9445
	4.9455
	4.9461
	4.9493
	4.9522
	4.953
	4.954
	4.954
	4.9542
	4.9543
	4.9588
	4.961
	4.961
	4.962
	4.9642
	4.9675
	4.9685
	4.9697
	4.9719
	4.9721
	4.9722
	4.9735
	4.9772
	4.9792
	4.98
	4.9811
	4.9825
	4.9827
	4.9865
	4.9871
	4.9891
	4.9897
	4.9899
	4.9929
	4.9959
	4.9981
	4.9983
	4.999
	4.9995
	5.0011
	5.0015
	5.0059
	5.0093
	5.0138
	5.0196
	5.0229
	5.023
	5.0243
	5.0246
	5.0248
	5.0266
	5.0283
	5.0288
	5.0305
	5.031
	5.0313
	5.0345
	5.0358
	5.036
	5.0387
	5.0414
	5.0473
	5.0514
	5.0545
	5.0553
	5.0566
	5.0576
	5.0583
	5.0587
	5.0608
	5.0618
	5.0634
	5.0637
	5.0664
	5.0676
	5.0676
	5.0684
	5.069
	5.0695
	5.0716
	5.0727
	5.0736
	5.0758
	5.0769
	5.0771
	5.0833
	5.0838
	5.0845
	5.0875
	5.0898
	5.0912
	5.0919
	5.092
	5.0937
	5.0967
	5.098
	5.105
	5.1054
	5.1057
	5.1067
	5.1079
	5.1159
	5.1168
	5.1173
	5.1178
	5.1221
	5.1256
	5.1257
	5.1261
	5.127
	5.1276
	5.1314
	5.1326
	5.1331
	5.1346
	5.14
	5.1408
	5.142
	5.1433
	5.1448
	5.1463
	5.1488
	5.1546
	5.1554
	5.1556
	5.1565
	5.1574
	5.158
	5.1594
	5.1605
	5.1606
	5.161
	5.1614
	5.1638
	5.1676
	5.1692
	5.1741
	5.1752
	5.1755
	5.176
	5.1771
	5.1771
	5.1792
	5.1796
	5.18
	5.1806
	5.1841
	5.1846
	5.1853
	5.188
	5.1881
	5.1894
	5.1914
	5.1929
	5.1953
	5.196
	5.1969
	5.2027
	5.2031
	5.2035
	5.2055
	5.2063
	5.2063
	5.2066
	5.208
	5.208
	5.2088
	5.2117
	5.2121
	5.2132
	5.2134
	5.2144
	5.2168
	5.217
	5.2188
	5.2206
	5.221
	5.222
	5.2225
	5.2257
	5.2259
	5.226
	5.2301
	5.2332
	5.2338
	5.2346
	5.2372
	5.238
	5.241
	5.2411
	5.2438
	5.2451
	5.2453
	5.2458
	5.2462
	5.2467
	5.2492
	5.2494
	5.2512
	5.2519
	5.2535
	5.2548
	5.2588
	5.2593
	5.2595
	5.2604
	5.2639
	5.2715
	5.273
	5.275
	5.2751
	5.2751
	5.2753
	5.2769
	5.2771
	5.2772
	5.2774
	5.2778
	5.28
	5.2819
	5.2829
	5.2842
	5.2874
	5.2877
	5.2888
	5.2908
	5.291
	5.291
	5.2926
	5.2934
	5.2941
	5.2944
	5.2948
	5.2974
	5.2994
	5.3003
	5.3007
	5.3015
	5.3017
	5.3022
	5.3048
	5.307
	5.3085
	5.31
	5.3101
	5.3131
	5.3155
	5.3183
	5.3192
	5.3207
	5.3229
	5.3233
	5.3245
	5.3271
	5.3277
	5.328
	5.3333
	5.3336
	5.3338
	5.336
	5.3385
	5.3389
	5.3414
	5.3414
	5.3449
	5.3456
	5.3478
	5.3485
	5.3485
	5.3488
	5.3499
	5.3509
	5.3535
	5.3546
	5.3557
	5.357
	5.3587
	5.3593
	5.361
	5.3622
	5.3636
	5.3637
	5.3639
	5.3662
	5.3679
	5.3693
	5.3728
	5.3732
	5.3734
	5.374
	5.3779
	5.3786
	5.3787
	5.3788
	5.3801
	5.3827
	5.383
	5.3835
	5.3841
	5.3848
	5.3856
	5.3861
	5.3866
	5.3874
	5.39
	5.3904
	5.3919
	5.393
	5.3954
	5.3983
	5.3989
	5.3998
	5.3998
	5.4022
	5.4025
	5.4033
	5.409
	5.4101
	5.4114
	5.4138
	5.4142
	5.4143
	5.4176
	5.4188
	5.4218
	5.4218
	5.4228
	5.4229
	5.4231
	5.4233
	5.4236
	5.4245
	5.4259
	5.4268
	5.4293
	5.4298
	5.4305
	5.4309
	5.4365
	5.4399
	5.4411
	5.4412
	5.4422
	5.4423
	5.4433
	5.4435
	5.4442
	5.4447
	5.4449
	5.446
	5.4492
	5.4496
	5.4547
	5.4551
	5.4609
	5.4613
	5.463
	5.4657
	5.4662
	5.4678
	5.4681
	5.4685
	5.4702
	5.4718
	5.4729
	5.4736
	5.4744
	5.4753
	5.4777
	5.4785
	5.4794
	5.4795
	5.4812
	5.4817
	5.4819
	5.4829
	5.4835
	5.4843
	5.4854
	5.4874
	5.4897
	5.4908
	5.4919
	5.4923
	5.4929
	5.494
	5.4942
	5.4953
	5.4959
	5.4963
	5.5
	5.5003
	5.5027
	5.5042
	5.5049
	5.5057
	5.5058
	5.5097
	5.5122
	5.5138
	5.5176
	5.5191
	5.5229
	5.5236
	5.5239
	5.5265
	5.527
	5.5283
	5.5285
	5.5288
	5.5303
	5.5307
	5.5327
	5.5334
	5.5364
	5.5392
	5.5402
	5.5404
	5.5416
	5.5461
	5.5474
	5.5499
	5.5503
	5.5505
	5.5551
	5.5578
	5.5583
	5.5607
	5.5614
	5.5618
	5.5626
	5.5674
	5.571
	5.5739
	5.5751
	5.5753
	5.576
	5.5767
	5.5781
	5.5783
	5.5788
	5.579
	5.579
	5.5791
	5.5803
	5.5852
	5.5875
	5.5906
	5.5925
	5.5927
	5.5938
	5.5959
	5.6006
	5.6017
	5.6041
	5.6055
	5.6057
	5.6105
	5.6112
	5.6114
	5.6115
	5.6124
	5.6128
	5.6131
	5.6137
	5.6144
	5.6191
	5.6208
	5.6209
	5.6219
	5.624
	5.6245
	5.6246
	5.6249
	5.6252
	5.6256
	5.6266
	5.6269
	5.6284
	5.6291
	5.6298
	5.6377
	5.6381
	5.6385
	5.6412
	5.6433
	5.6436
	5.647
	5.648
	5.6535
	5.6536
	5.6548
	5.6572
	5.659
	5.6608
	5.6615
	5.6635
	5.6653
	5.6662
	5.6666
	5.6674
	5.6681
	5.6685
	5.6695
	5.6702
	5.6704
	5.6706
	5.671
	5.6783
	5.683
	5.6864
	5.6867
	5.6873
	5.6884
	5.6887
	5.6918
	5.692
	5.6925
	5.6932
	5.6939
	5.6941
	5.6955
	5.6955
	5.6956
	5.6957
	5.6959
	5.6959
	5.7003
	5.7021
	5.7025
	5.708
	5.708
	5.7095
	5.7109
	5.712
	5.714
	5.715
	5.7175
	5.7181
	5.7189
	5.7194
	5.7199
	5.721
	5.7218
	5.7299
	5.7307
	5.7321
	5.733
	5.734
	5.7365
	5.7371
	5.7372
	5.7376
	5.7403
	5.7438
[truncated: 340 more rows]
