# Supplementary material for: TrpV1 receptor activation rescues neuronal function and network gamma oscillations from Aβ-induced impairment in mouse hippocampus in vitro
Source: eLife. 2018 Nov 12;7:e37703. doi: 10.7554/eLife.37703 (PMC6281315; doi:10.7554/eLife.37703)
Supplement: Figure 5—figure supplement 1—source data 1. [file elife-37703-fig5-figsupp1-data1.xlsx]

## Sheet: IPSCs (Vh=0mV)
IPSCs (Vh=0mV)
	Abeta Treatment
	Frequency			Amplitude			Charge Transfer
	Control	Abeta		Control	Abeta		Control	Abeta
	22.5567	22.53		102.832	62.5004		1434183	914520
	24.07	24.4467		37.3516	26.0571		593263	404383
	24.45	25.5733		122.769	67.4937		1907725	1092267
	27.6533	30.4767		50.2635	44.371		905173	782535
	25.8433	22.5267		83.3869	29.6654		1637096	502772
	24.0833	24.6233		85.1968	65.7867		806269	647833
	19.4967	19.0367		27.5679	22.4977		219864	162024
	23.8567	24.52		180.493	117.711		1412746	1032787
	23.2933	23.1133		103.798	82.7569		736745	686401
	Abeta+Cp Treatment
	Frequency			Amplitude			Charge Transfer
	Control	Abeta +Cp		Control	Abeta +Cp		Control	Abeta +Cp
	38.0267	39.51		70.2372	43.5112		1459276	997224
	33.87	33.1167		40.1197	39.5221		804668	764436
	27.6367	19.6067		33.5731	24.2192		474791	220963
	34.9867	32.2867		67.6038	26.692		1252935	442788
	32.3433	30.12		120.372	105.103		2176279	1631512
	22	22.27		96.3077	93.5513		1117150	1096454
