# Supplementary material for: TrpV1 receptor activation rescues neuronal function and network gamma oscillations from Aβ-induced impairment in mouse hippocampus in vitro
Source: eLife. 2018 Nov 12;7:e37703. doi: 10.7554/eLife.37703 (PMC6281315; doi:10.7554/eLife.37703)
Supplement: Figure 5—source data 1. [file elife-37703-fig5-data1.xlsx]

## Sheet: EPSCs (Vh=  -70mV)
EPSCs (Vh= -70mV)
	Abeta Treatment
	Frequency			Amplitude			Charge Transfer
	Control	Abeta		Control	Abeta		Control	Abeta
	26.8267	25.3467		29.7352	14.4425		423833	225392
	26.8733	33.3167		21.5072	21.2695		305771	436970
	34.0067	31.0333		30.113	29.0124		583287	536593
	42.7433	47.7167		31.4698	32.987		661672	743081
	35.7233	34.6033		19.7085	8.57295		347620	136096
	37.5067	49.59		29.9271	25.5445		592856	626924
	38.9133	35.5167		24.2842	15.1737		520737	330596
	Abeta+Cp Treatment
	Frequency			Amplitude			Charge Transfer
	Control	Abeta +Cp		Control	Abeta +Cp		Control	Abeta +Cp
	26.78	33.93		16.21	16.11		47.958	71.2541
	63.18	73.62		32.55	40.13		149.966	224.724
	28.37	14.84		16.19	13.33		64.4925	26.8968
	20.92	16.05		18.41	16.95		69.2938	51.383
	36.52	32.27		22.21	19.48		108.116	88.0604
	Abeta+Cp+Cz Treatment
	Frequency			Amplitude			Charge Transfer
	Control	Abeta +Cp +Cz		Control	Abeta +Cp +Cz		Control	Abeta +Cp +Cz
	33.1333	30.2533		28.5647	18.9123		503012	306092
	25.0033	12.7867		14.4326	9.64243		166071	61598.3
	32.8333	47.1933		15.2716	14.7724		290766	389566
	33.1633	37.48		30.6771	29.0035		570915	595570
	39.5967	33.5233		27.0275	17.2935		554240	318529
	30.3933	31.13		10.7327	8.16387		213017	165843
	23.4967	21.88		15.214	13.3242		229221	213620
	27.7233	26.11		16.4473	16.0467		273124	256074

## Sheet: IPSCs (Vh= -70mV)
IPSCs (Vh= -70mV)
	Abeta Treatment
	Frequency			Amplitude			Charge Transfer
	Control	Abeta		Control	Abeta		Control	Abeta
	29	29.6967		58.6915	33.2279		860634	467882
	17.9667	24.4067		87.0592	36.2266		787302	433257
	21.4533	17.27		52.1194	42.7509		515071	389736
	17.83	14.9533		42.1435	37.2528		383522	268558
	22.82	23.54		74.517	72.4525		1018236	979695
	Abeta+Cp Treatment
	Frequency			Amplitude			Charge Transfer
	Control	Abeta +Cp		Control	Abeta +Cp		Control	Abeta +Cp
	7.44333	7.26667		110.907	79.4511		65.8109	44.322
	25.0433	20.71		193.895	124.286		593.873	298.083
	27.5333	29.1233		211.068	191.455		673.452	708.373
	13.94	15.72		131.335	119.3		186.278	153.552
	22.8967	23.3167		94.8148	84.9915		443.002	365.65
	7.80667	8.48333		39.8146	46.6388		35.721	38.8993
	Abeta+Cp+Cz Treatment
	Frequency			Amplitude			Charge Transfer
	Control	Abeta +Cp +Cz		Control	Abeta +Cp +Cz		Control	Abeta +Cp +Cz
	14.1233	14.61		84.2097	53.6402		664529	411357
	11.39	10.4633		46.5181	37.3374		270313	195071
	33.23	34.5533		156.062	43.1544		2694181	741961
	40.7167	26.79		62.9678	56.3396		1136726	689821
	15.6167	12.26		27.4367	18.5683		194820	111692
