# Supplementary material for: TrpV1 receptor activation rescues neuronal function and network gamma oscillations from Aβ-induced impairment in mouse hippocampus in vitro
Source: eLife. 2018 Nov 12;7:e37703. doi: 10.7554/eLife.37703 (PMC6281315; doi:10.7554/eLife.37703)
Supplement: Figure 6—source data 1. [file elife-37703-fig6-data1.xlsx]

## Sheet: Gamma Power Time Course
Time Courses
	Time (min)	Gama Power (Control)
		n1	n2	n3	n4	n5	n6	n7	n8	n9	n10	n11	n12	n13	n14	n15
	-1	5.43786	29.2443	42.7489	13.3918	6.83701	19.9291	19.4219	22.6846	12.6047	10.9724	17.5458	25.2435	6.30266	1.95215	27.7226
	5	6.34835	32.6289	53.1138	13.9965	10.0727	16.7163	19.9689	23.401	12.3594	13.0683	19.8361	32.7615	7.80961	2.09125	29.3079
	10	6.4501	31.5724	58.1552	11.8521	11.2044	14.43	22.4385	25.7082	14.6954	14.3896	17.5469	31.3648	12.5451	5.53454	32.6054
	15	6.53291	30.1087	55.2565	10.2335	14.7346	12.8969	20.5878	28.7852	16.4542	16.6968	19.5502	31.8673	14.2703	5.82126	31.1224
	20	6.61865	29.1942	60.9192	7.38589	15.4148	13.727	20.4361	31.8885	17.8115	16.8213	23.0124	32.9147	13.704	5.10877	30.6016
	25	5.99415	29.1821	59.4604	7.40416	14.7028	15.0712	21.9181	33.9229	19.3768	17.5091	20.8655	35.8089	15.5275	5.3073	26.1705
	30	6.40252	28.9287	60.7146	7.32562	12.9362	17.7439	21.1456	35.6162	19.733	18.2223	16.5514	35.9812	16.5821	5.3766	28.3026
	Time (min)	Gamma Power (Abeta)
		n1	n2	n3	n4	n5	n6	n7	n8	n9	n10	n11	n12	n13	n14	n15	n16	n17	n18
	-1	21.2806	27.5774	5.53917	8.34972	1.57865	2.81573	10.0877	3.71426	4.79974	2.36261	15.0522	1.35605	0.818616	2.96246	2.90586	5.91929	4.58718	3.44459
	5	29.3658	23.7006	4.61131	9.29394	1.93787	3.71247	11.7209	4.68509	6.19651	3.12801	14.1016	2.06282	1.16056	3.57707	3.88557	9.42484	4.67976	4.9487
	10	22.2185	16.0615	8.16082	6.96422	2.17455	4.3342	11.0838	5.3746	7.2804	4.14773	18.2345	2.39913	1.3495	3.7953	4.33226	12.2059	5.15576	5.29658
	15	26.6444	20.1962	7.65663	7.82951	2.43966	4.64646	11.5354	6.08873	8.33946	4.60533	19.4621	2.974	1.64648	3.32779	5.03923	14.8746	3.29865	5.83683
	20	27.1314	22.617	6.9405	8.18147	2.76673	4.76851	9.33488	6.28921	9.22893	4.30693	17.8401	4.75238	1.84853	3.27746	5.53101	16.684	3.09616	6.19473
	25	29.1519	25.8285	6.69647	7.84411	2.96592	4.67516	5.92806	6.39882	10.4626	4.94506	19.5854	5.39056	1.84794	3.03308	5.5157	18.3681	3.2619	6.087
	30	32.837	27.9564	6.34342	8.48264	3.22643	4.60107	5.65411	6.44621	10.5417	4.72813	18.9286	6.30487	1.89146	3.24625	6.01231	21.3685	3.57321	6.43754
	Time (min)	Gamma Power (Abeta +Cp)
		n1	n2	n3	n4	n5	n6	n7	n8	n9	n10	n11	n12	n13	n14	n15	n16
	-1	20.8124	4.2992	6.73143	3.95969	1.43103	15.0487	2.17778	3.50869	2.39399	4.30451	6.68331	4.05659	11.5873	12.5724	16.2437	10.0438
	5	22.9822	7.63179	11.1486	5.0817	2.52983	17.8004	2.94032	4.4304	3.0964	8.75148	8.05006	5.33226	16.302	18.8312	23.6244	14.5037
	10	29.0126	9.6232	13.6448	5.89243	2.88437	19.6907	3.67836	5.49841	3.50137	10.2557	8.55299	6.18236	17.3484	33.6449	26.4528	17.1632
	15	35.0089	11.0651	17.1255	7.00859	3.9246	22.3272	3.90568	9.22936	3.50187	12.3336	9.203	6.94247	19.4769	40.0417	27.0727	20.2795
	20	37.2394	13.7385	19.0247	7.99478	4.39392	24.0881	4.14936	6.17274	3.57806	17.4898	6.63627	6.72366	22.8157	46.0737	29.5713	25.0832
	25	38.9394	15.4742	19.5482	8.9507	4.84234	23.0784	4.42264	6.36071	3.65221	21.1055	6.24802	7.2039	22.6338	52.6398	30.1117	28.6617
	30	41.8746	16.1737	21.5205	8.2832	4.63892	23.3902	3.43016	7.60833	5.58441	9.56152	6.55663	7.46906	25.2744	58.6113	29.0618	30.5136
	Time (min)	Gamma Power (Abeta +Cp +Cz)
		n1	n2	n3	n4	n5	n6	n7	n8	n9	n10	n11
	-1	5.5854	0.770713	2.34372	7.13248	6.74941	4.97091	7.75174	6.22547	13.0454	9.74781	8.02606
	5	6.11172	0.902116	2.64785	8.73453	6.60326	6.19711	9.07681	7.57661	12.6235	11.8831	10.6335
	10	8.85629	0.662435	2.23289	9.36624	6.32702	6.92635	11.5024	8.88562	12.9054	12.8074	12.4546
	15	10.1799	0.711532	1.78534	10.4346	6.61995	7.00535	13.1056	9.4146	10.9941	12.8288	13.1633
	20	10.3306	0.751695	1.65166	10.5861	7.57366	7.83348	14.9085	10.4663	11.9121	13.7727	14.4213
	25	13.539	0.762292	1.8324	11.5856	9.29531	7.94247	16.6846	11.1937	10.7318	14.4138	15.1759
	30	13.7474	0.79106	1.99971	12.1911	10.3178	8.46523	17.9325	12.1903	11.6563	15.7193	16.3503

## Sheet: Gamma Power Quantification
	Quantification before treatment					Quantification 30 min after treatment
	Control	Abeta	Abeta +Cp	Abeta +Cp +Cz		Control	Abeta	Abeta +Cp	Abeta +Cp +Cz
	5.43786	21.2806	20.8124	5.5854		6.40252	32.837	41.8746	13.7
	29.2443	27.5774	4.2992	0.770713		28.9287	27.9564	16.1737	0.8
	42.7489	5.53917	6.73143	2.34372		60.7146	6.34342	21.5205	2
	13.3918	8.34972	3.95969	7.13248		7.32562	8.48264	8.2832	12.2
	6.83701	1.57865	1.43103	6.74941		12.9362	3.22643	4.63892	10.4
	19.9291	2.81573	15.0487	4.97091		17.7439	4.60107	23.3902	8.4
	19.4219	10.0877	2.17778	7.75174		21.1456	5.65411	3.43016	18.6
	22.6846	3.71426	3.50869	6.22547		35.6162	6.44621	7.60833	12.2
	12.6047	4.79974	2.39399	13.0454		19.733	10.5417	5.58441	11.7
	10.9724	2.36261	4.30451	9.74781		18.2223	4.72813	9.56152	15.7
	17.5458	15.0522	6.68331	8.02606		16.5514	18.9286	6.55663	16.4
	25.2435	1.35605	4.05659			35.9812	6.30487	7.46906
	6.30266	0.818616	11.5873			16.5821	1.89146	25.2744
	1.95215	2.96246	12.5724			5.3766	3.24625	58.6113
	27.7226	2.90586	16.2437			28.3026	6.01231	29.0618
		5.91929	10.0438				21.3685	30.5136
		4.58718					3.57321
		3.44459					6.43754
