# Supplementary material for: TrpV1 receptor activation rescues neuronal function and network gamma oscillations from Aβ-induced impairment in mouse hippocampus in vitro
Source: eLife. 2018 Nov 12;7:e37703. doi: 10.7554/eLife.37703 (PMC6281315; doi:10.7554/eLife.37703)
Supplement: Source data 1. [file elife-37703-data1.xlsx]

## Sheet: Sheet1
AP firing frequency
Ctrl	Aβ
2.61333	2.66
3.82667	4.81667
6.92667	10.99
1.84	2.01
3.92333	4.03
